# Supplementary material
Source: Elsevier journal article supplement (https://rcastoragev2.blob.core.windows.net/b4156aa066230568c61ac1858ac01771/mmc1.pdf)
Supplement: mmc1 [file mmc1.pdf]

## Supporting Information

The stability landscape of *de novo* TIM barrels explored by a modular design approach

Sergio Romero-Romero, Miguel Costas, Daniel-Adriano Silva Manzano, Sina Kordes,  
Erendira Rojas-Ortega, Cinthya Tapia, Yasel Guerra, Sooruban Shanmugaratnam,  
Adela Rodríguez-Romero, David Baker,\* Birte Höcker,\*  
D. Alejandro Fernández-Velasco.\*

\* Corresponding authors. D. A. Fernández-Velasco: [fdaniel@unam.mx](mailto:fdaniel@unam.mx),  
B. Höcker: [birte.hoecker@uni-bayreuth.de](mailto:birte.hoecker@uni-bayreuth.de), D. Baker: [dabaker@uw.edu](mailto:dabaker@uw.edu)

This file includes:

- Supporting Text.
- Supplementary Figures S1 to S15.
- Supplementary Tables S1 to S7.

## Supporting Text

### Exploratory characterization of first-round designs

The proteins from the first design round (DeNovoTIMs 1-10) as well as DeNovoTIM0, sTIM11, and sTIM11noCys were characterized by circular dichroism (CD) and differential scanning calorimetry (DSC) (Fig. S3). All variants presented far-UV CD spectra with a high content of regular secondary structural elements compatible with  $\alpha/\beta$  proteins. For sTIM11 and sTIM11noCys, the most pronounced minimum of the spectra was observed at 222 nm whereas, for DeNovoTIM0 and DeNovoTIM1-10, it was found at 206 and 208 nm, respectively (Fig. S3 and Fig. S4A). According to the Gibbs Helmholtz equation, high  $T_m$  and  $\Delta H$  values are reflected in larger areas under the stability curve, therefore, selection of the best designs was based on their thermal unfolding parameters.

Analysis of the internal core designs showed that DeNovoTIM2 and DeNovoTIM3 unfold irreversibly and uncooperatively, whereas DeNovoTIM4 unfolds cooperatively with a  $T_m$  value which is 15 degrees higher than DeNovoTIM0 (Fig. S3B). However, DeNovoTIM1 unfolds cooperatively with a further increased  $T_m$  that is 24 degrees higher than DeNovoTIM0 (Fig. S3B) and its unfolding  $\Delta H$  determined by the DSC endotherm is almost twice than that of DeNovoTIM0 (Fig. S3C). Thus, DeNovoTIM1 was chosen as the best design of this group. Amongst the bottom core

designs, DeNovoTIM7 did not overexpress soluble, and no significant efforts were made to solubilize it after unfolding/refolding of inclusion bodies. The thermal unfolding of DeNovoTIM5 is less cooperative and the protein unfolds with a  $T_m$  slightly higher than DeNovoTIM0. In contrast, DeNovoTIM6 has a  $T_m$  that is 45 degrees higher than DeNovoTIM0 and shows a highly cooperative unfolding transition (Fig. S3E-S3F and table 1). Hence, DeNovoTIM6 is the most successful design within this group. Finally, all top core designs (DeNovoTIM8-10) unfold cooperatively; nevertheless, DeNovoTIM8 displays the highest  $T_m$  and  $\Delta H$  of this group (Fig. S3H-S3I). Therefore, DeNovoTIM8 is considered the best design among the proteins belonging to this group.

### **Spectroscopic and hydrodynamic characterization of DeNovoTIMs**

sTIM11, sTIM11noCys, and all DeNovoTIM variants presented the characteristic far-UV CD spectra observed for  $\alpha/\beta$  proteins (Fig. 2A). Nevertheless, the secondary structure content deconvoluted from the spectra showed variations in the relative amount of helices and strands, particularly for DeNovoTIM0 and DeNovoTIM1, which have the lowest helical content (table S5). For those DeNovoTIMs for which a three-dimensional structure was obtained (see below), the secondary structure content calculated from the structure and the deconvolution of CD spectra correlates adequately (table S5).

The near-UV CD spectra of DeNovoTIMs (Fig. 2B) showed a peak with fine structure between 290 and 295 nm, characteristic for tryptophan residues. A peak between 275-283 nm was also observed in the designs that contain tyrosine residues (table S3). It is known that the shape and intensities of the near-UV CD spectrum depend not only on the number and identity of aromatic residues but also on their environment and three-dimensional position within the protein core [89]. The spectra observed in Fig. 2B indicate that aromatic residues in the protein are structured with significant differences in the native environment. The latter is in agreement with the intrinsic fluorescence (IF) spectra, where native  $\lambda_{\text{max}}$  is in the 329-345 nm range (Fig. 2C and Fig. S6). Likewise, the spectral center of mass (SCM) is between 346 and 357 nm, indicating differences in the environment of aromatic residues among native DeNovoTIMs (table S5). The fluorescence properties of DeNovoTIM0 indicate partial exposure of aromatic residues. All first-round designs show a considerable blue-shift in both  $\lambda_{\text{max}}$  and SCM; this trend continues in the second- and third-round designs and should be attributed to changes in both the number and the solvent exposure of Trp residues (table S3 and table S5).

All DeNovoTIMs adopt a monomeric and compact shape as revealed by the invariant value of the Stokes radius determined by analytical size exclusion chromatography over a twenty-fold protein concentration range (table S5). DeNovoTIM0 is also monomeric but shows a Stokes radius ( $26.1 \pm 0.3 \text{ \AA}$ ) slightly higher than that expected for a compact protein of this size ( $22.5 \pm 1.0 \text{ \AA}$ ), but still far

away from the expected value for an unfolded conformation ( $42.0 \pm 1.0 \text{ \AA}$ ) [33]. This is in agreement with the red shift in the IF spectra and suggests a slightly expanded conformation for DeNovoTIM0.

### Residual structure in the thermal unfolding of DeNovoTIMs

All DeNovoTIMs, except DeNovoTIM13 and DeNovoTIM14, showed reversibility i.e. samples were heated up to  $125 \text{ }^{\circ}\text{C}$  and their endotherms were completely recovered in a second heating scan (Fig. S7). All reversible transitions were well fitted to the two-state model ( $\text{N} \rightleftharpoons \text{U}$ ) (Fig. S8) and the calorimetric criterion ( $\Delta H_{\text{vH}}/\Delta H$ ) was very close to 1, in agreement with a two-state mechanism (table 1). DSC experiments performed at different protein concentrations ( $0.25$  to  $2.5 \text{ mg mL}^{-1}$ ) exhibited the same  $T_m$ , indicating that thermal unfolding is under thermodynamic control (Fig. S8).

The observed unfolding  $\Delta H$  varies greatly, showing values both lower and higher than DeNovoTIM0, sTIM11noCys, and sTIM11 (table 1). When proteins of the same size are compared, the main reasons for finding differences in their unfolding  $\Delta H$  are the number of disrupted internal interactions, as well as the hydration of groups exposed upon unfolding [90]. Extreme scenarios were observed in DeNovoTIMs, e.g. DeNovoTIM6 has a  $\Delta H = 125 \pm 2 \text{ kcal mol}^{-1}$ , which is  $100 \text{ kcal mol}^{-1}$  more than that of DeNovoTIM0, and close to the expected value for a protein of 184 residues according to previously reported parametric equations ( $128 \pm 4 \text{ kcal mol}^{-1}$ ) [34].

Otherwise, several DeNovoTIMs exhibit small  $\Delta H$  values, particularly DeNovoTIM14 ( $\Delta H = 14 \text{ kcal mol}^{-1}$ ; Fig. S10E and table 1). There are at least two main reasons for such a small  $\Delta H$ , namely either the native state is not fully folded or the unfolded state is not completely unfolded. The spectroscopic, structural, and chemical unfolding properties shown in Fig. 2 indicate that the proteins are well folded in the native state, a conclusion that is supported by the crystal structures (see below). It is known that both  $\Delta H$  and  $T_m$  decrease in the presence of chemical denaturants [91]. When DeNovoTIM14 was unfolded by temperature in the presence of urea, the second transition disappeared and the  $T_m$  of the observed endotherm remained almost unchanged at  $\sim 90^\circ\text{C}$  (Fig. 2F, Fig. S10B, and Fig. S10D). Unexpectedly, the unfolding enthalpy increased linearly from the value observed without denaturant to a value close to the parametric one at 6.0 M urea (Fig. S10A and Fig. S10E). This atypical behavior in DeNovoTIM14 may be explained by an increased exposure of nonpolar residues upon unfolding in the presence of urea. These results suggest that the reason for the low unfolding enthalpy in some DeNovoTIMs is likely the high content of residual structure in the unfolded state.

Likewise, it has been shown that the residual structure of the unfolded state leads to decreased  $\Delta C_p$  values [35]. For sTIM11, sTIM11noCys, and DeNovoTIM6, the  $\Delta C_p$  were close to the estimated value from parametric equations for a protein of that size ( $2.6 \text{ kcal mol}^{-1} \text{ K}^{-1}$ ), whereas the other DeNovoTIMs showed a much lower  $\Delta C_p$ , with DeNovoTIM0 having the lowest value ( $0.44 \text{ kcal mol}^{-1} \text{ K}^{-1}$ , table 1). Accuracy in

thermodynamic parameters of unfolding has been discussed over the years and is especially crucial for  $\Delta C_p$  due to the baseline shift and its small magnitude. For DeNovoTIMs, the obtention of  $\Delta C_p$  was addressed with multiple determinations at varying protein concentration. The standard deviation ranged from 3 to 20 %, very similar to previous estimates for uncertainties in  $\Delta C_p$  [34,3]. A decrease in unfolding  $\Delta C_p$  suggests a non-fully solvated random-coil conformation with residual hydrophobic clusters in the unfolded state. Even though it was not possible to obtain the CD spectra of DeNovoTIMs that display  $T_m$  values higher than 90 °C, CD spectra of the unfolded state of the low  $T_m$  variants DeNovoTIM0, DeNovoTIM1, and DeNovoTIM8, as well as sTIM11 and sTIM11noCys, clearly showed residual structure (Fig. S4B).

### Irreversible thermal unfolding of DeNovoTIM13 and DeNovoTIM14

DeNovoTIM13 shows a  $T_m$  scan-rate dependent, indicating that its thermal unfolding is under kinetic control (Fig. S9). Because the irreversible thermal unfolding of DeNovoTIM13 and DeNovoTIM14 follows an irreversible two-state mechanism (N  $\rightarrow$  F), well described by a first-order rate constant [74,75], it was possible to determine the activation energy ( $E_{act}$ ) between the native and the transition state. For DeNovoTIM13, the average value obtained from the fitting of each endotherm ( $E_{act}$ = 118.2  $\pm$  2.7 kcal mol<sup>-1</sup>; Fig. S9A) is within the range reported for natural proteins of similar size. This value agrees with that determined from the Arrhenius plot ( $E_{act}$ = 118  $\pm$  2 kcal mol<sup>-1</sup>; Fig. S9B) and with the calculation from the effect of the scan rate on  $T_m$  ( $E_{act}$ = 124  $\pm$  2 kcal

mol<sup>-1</sup>; Fig. S9C).

In contrast, for DeNovoTIM14 a much lower kinetic stability was observed fitting the endotherms to the irreversible two-state model ( $E_{act}$  =  $38 \pm 1$  kcal mol<sup>-1</sup>; Fig. S10A), determined from the Arrhenius plot ( $E_{act}$  =  $38 \pm 1$  kcal mol<sup>-1</sup>; Fig. S10C), and extrapolating to 0 M urea ( $E_{act}$  =  $37 \pm 1$  kcal mol<sup>-1</sup>; Fig. S10F). As a consequence of having very different kinetic stabilities, the estimated half-life of DeNovoTIM13 at 25 °C is  $1.8 \times 10^{10}$  years and about 196 days for DeNovoTIM14. Clearly, it would be interesting to determine folding/unfolding rates in future kinetic studies of the *de novo* designed TIM barrels.

## Supplementary Figures

### List of supplementary figures

- **Fig. S1:** Flowchart of the Rosetta design protocol used to generate the DeNovoTIM collection.
- **Fig. S2:** Sequence alignment of DeNovoTIM barrels.
- **Fig. S3:** Exploratory characterization of first-round designs.
- **Fig. S4:** CD spectra in the peptidic region for DeNovoTIMs.
- **Fig. S5:** CD spectra in the aromatic region for DeNovoTIMs.
- **Fig. S6:** Intrinsic fluorescence spectra of DeNovoTIMs.
- **Fig. S7:** DSC instrument equilibration and thermal unfolding reversibility assessment of DeNovoTIMs.
- **Fig. S8:** DSC endotherms of DeNovoTIMs.
- **Fig. S9:** Irreversible thermal unfolding of DeNovoTIM13.
- **Fig. S10:** Irreversible thermal unfolding of DeNovoTIM14 in the presence of urea.
- **Fig. S11:**  $\Delta C_P$  determination of DeNovoTIMs at different protein concentrations.
- **Fig. S12:** Chemical unfolding of DeNovoTIMs followed by CD and IF (raw data).
- **Fig. S13:** Chemical unfolding of DeNovoTIMs followed by CD and IF (normalized data).
- **Fig. S14:** Thermodynamic cycles for DeNovoTIMs.
- **Fig. S15:** Hydrophobic clusters of DeNovoTIMs.

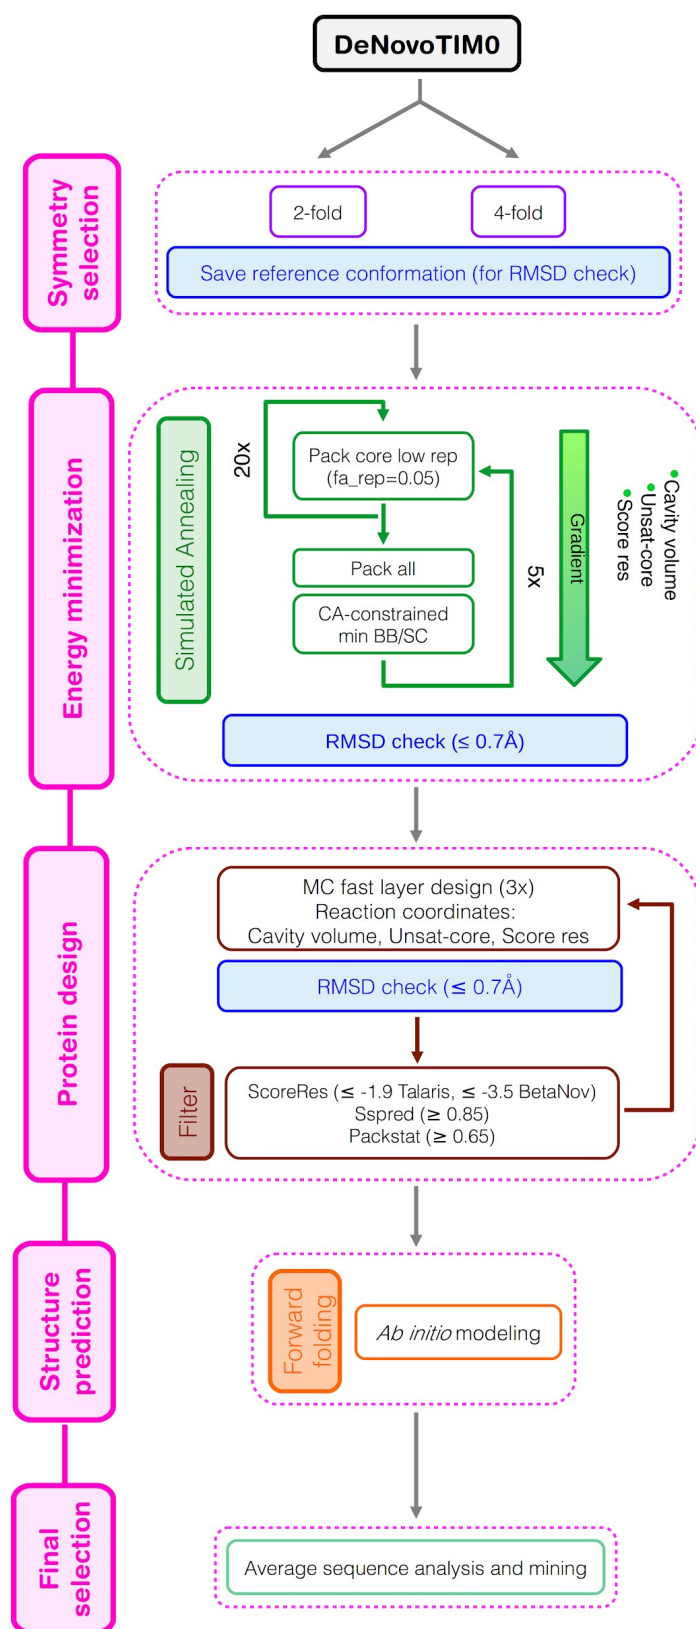

Fig. S1. Flowchart of the Rosetta design protocol used to generate the DeNovoTIM collection.

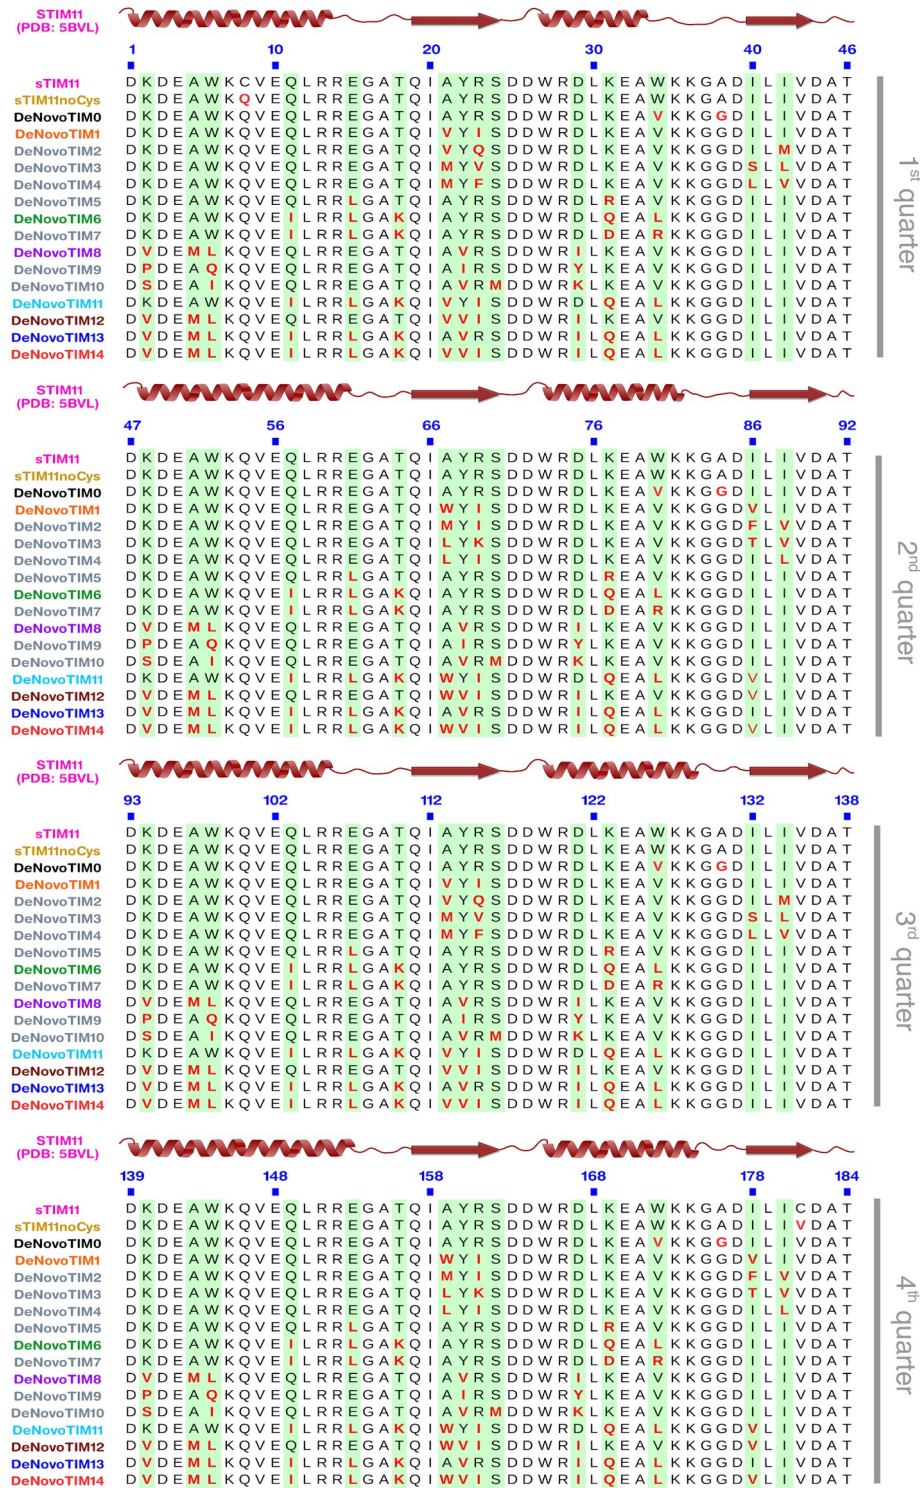

**Fig. S2. Sequence alignment of DeNovoTIM barrels.** On top of each TIM barrel quarter, the secondary structure of sTIM11 is shown (PDB ID: 5BVL). Mutations incorporated in each design are highlighted in red. sTIM11noCys is the symmetric version of sTIM11 removing the cysteine residues (C8Q/C181V). DeNovoTIM0 contains the additional mutations W34V and A38G, as well as their symmetry-related positions. See table S2 for a complete list of the mutations.

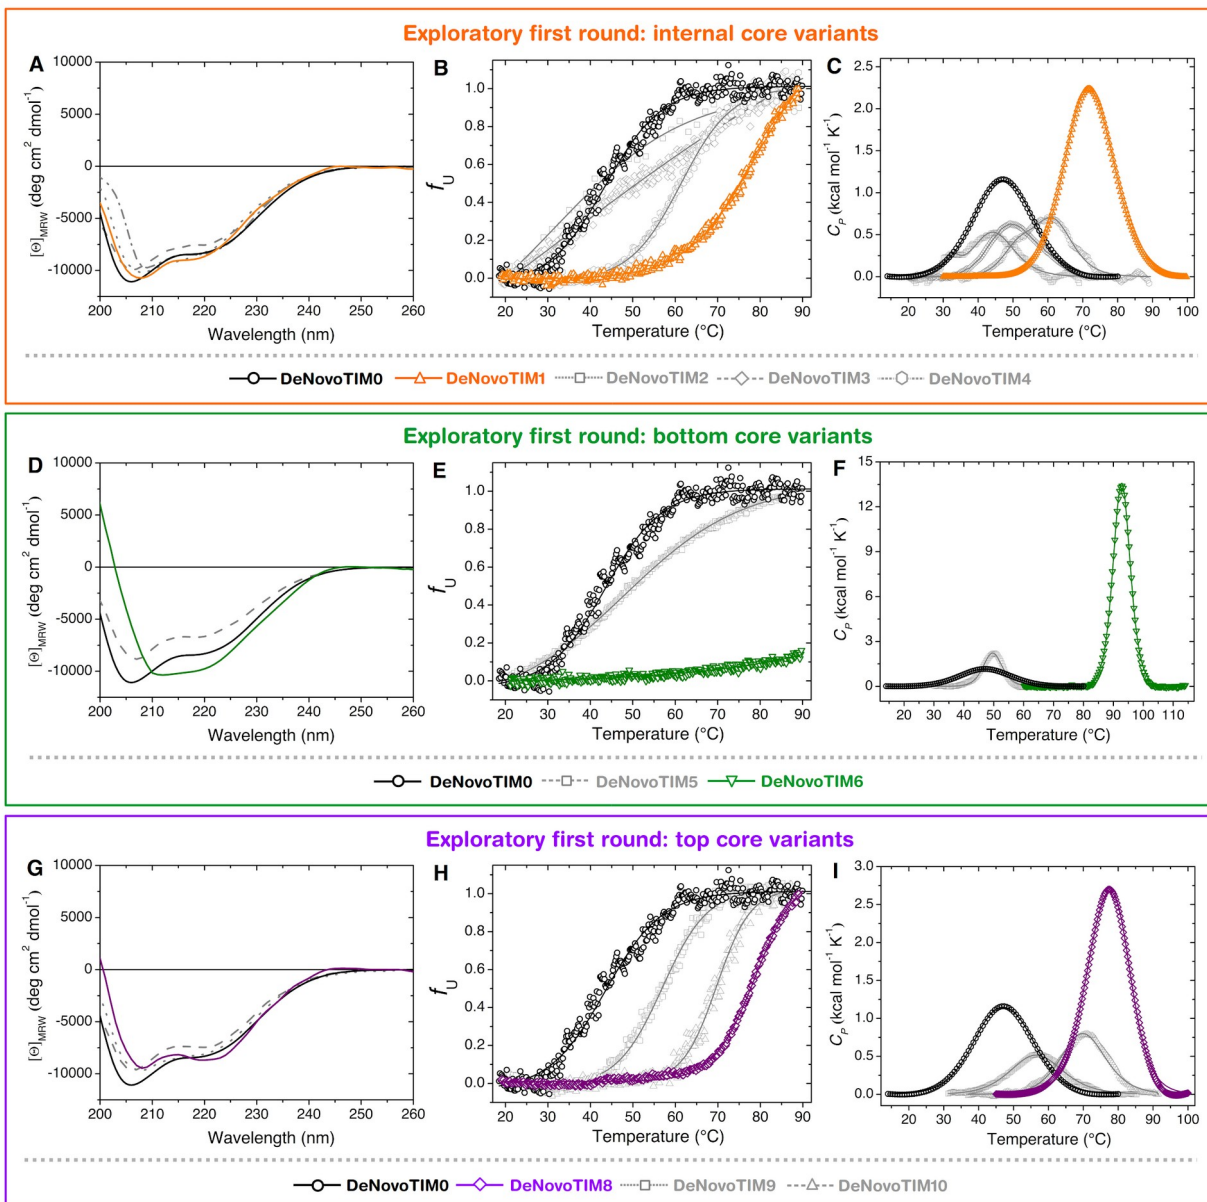

**Fig. S3. Exploratory characterization of first-round designs.** Far-UV CD spectra are shown in panels A, D, and G. Normalized thermal unfolding data followed by CD<sub>222 nm</sub> are presented in panels B, E, and H. Thermal unfolding experiments followed by DSC are shown in panels C, F, and I. Selected variants of each design group are highlighted in orange (DeNovoTIM1), green (DeNovoTIM6), or purple (DeNovoTIM8). In all experiments protein concentration was 0.4 mg mL<sup>-1</sup> in 10 mM sodium phosphate pH 8.

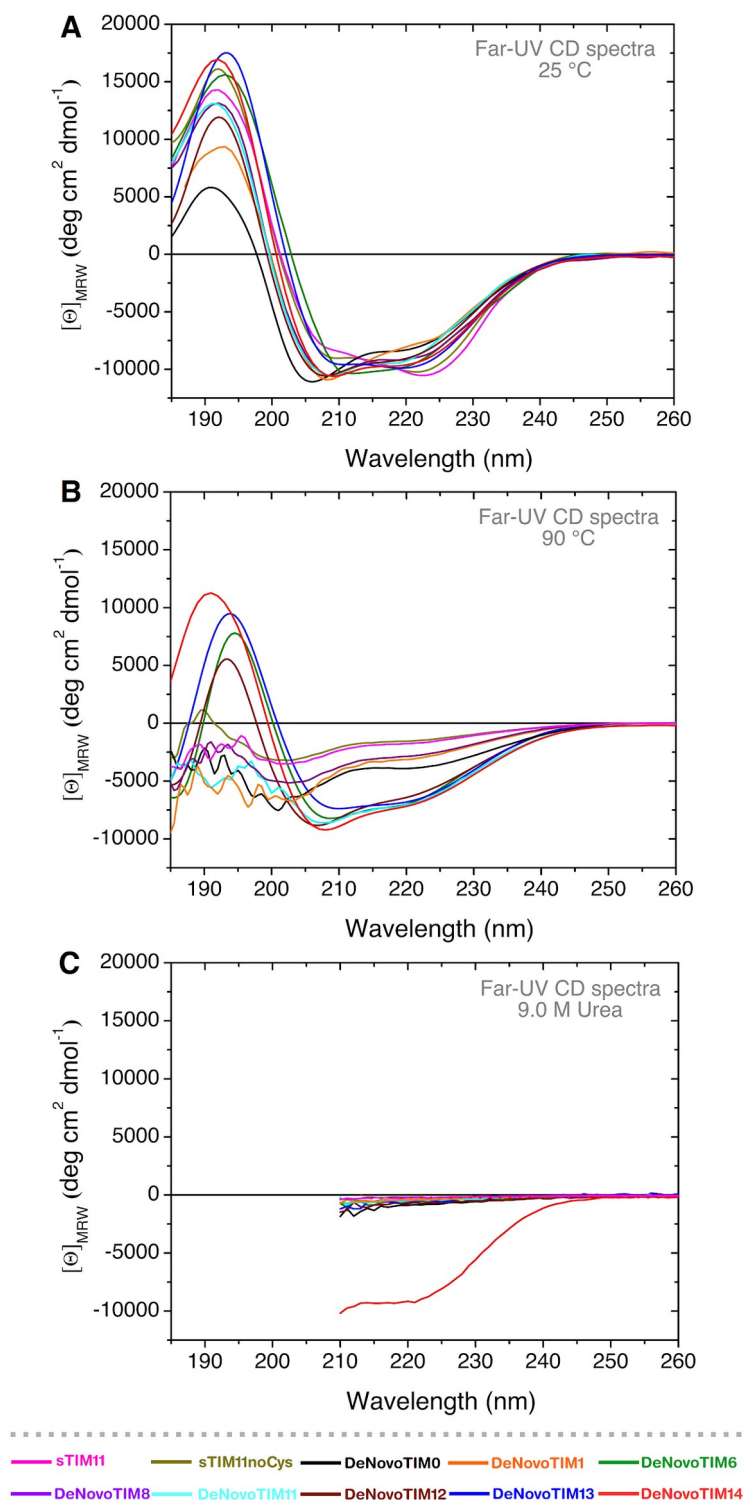

**Fig. S4. CD spectra in the peptidic region for DeNovoTIMs.** Far-UV CD spectra at 25 °C (A), 90 °C (B), and 9.0 M urea (C). Note that for DeNovoTIM14 at 9.0 M urea (solid red line) the spectrum is very similar to the native one (panel A). In 7.0 M GdnHCl the protein is completely unfolded and its spectrum is identical to all other DeNovoTIMs unfolded in 9.0 M urea (dotted red line). In all experiments protein concentration was 0.4 mg mL<sup>-1</sup> in 10 mM sodium phosphate pH 8.

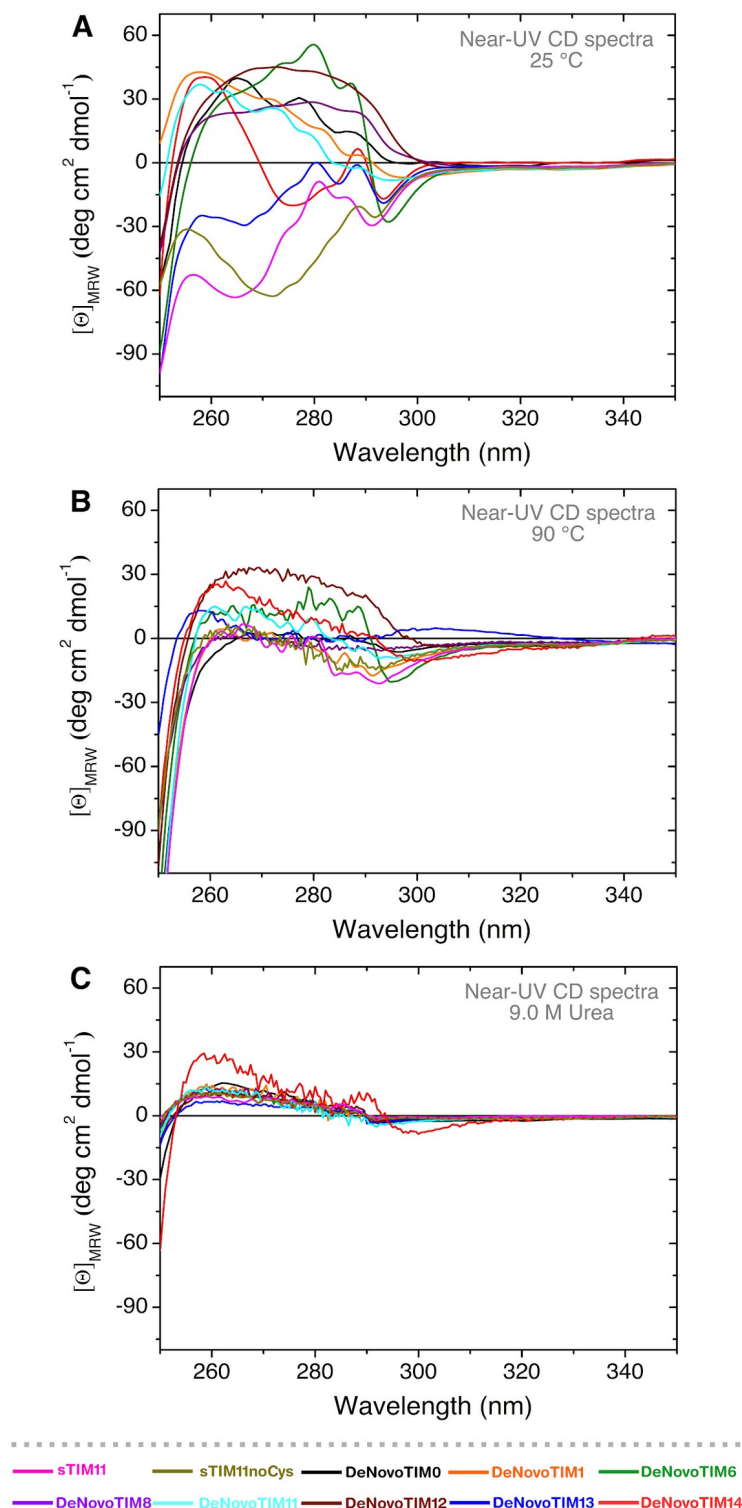

**Fig. S5. CD spectra in the aromatic region for DeNovoTIMs.** Near-UV CD spectra at 25 °C (A), 90 °C (B), and 9.0 M urea (C). Note that for DeNovoTIM14 at 9.0 M urea (solid red line) the spectrum is very similar to the native one (panel A). In 7.0 M GdnHCl the protein is completely unfolded and its spectrum is identical to all other DeNovoTIMs unfolded in 9.0 M urea (dotted red line). In all experiments protein concentration was 0.4 mg mL<sup>-1</sup> in 10 mM sodium phosphate pH 8.

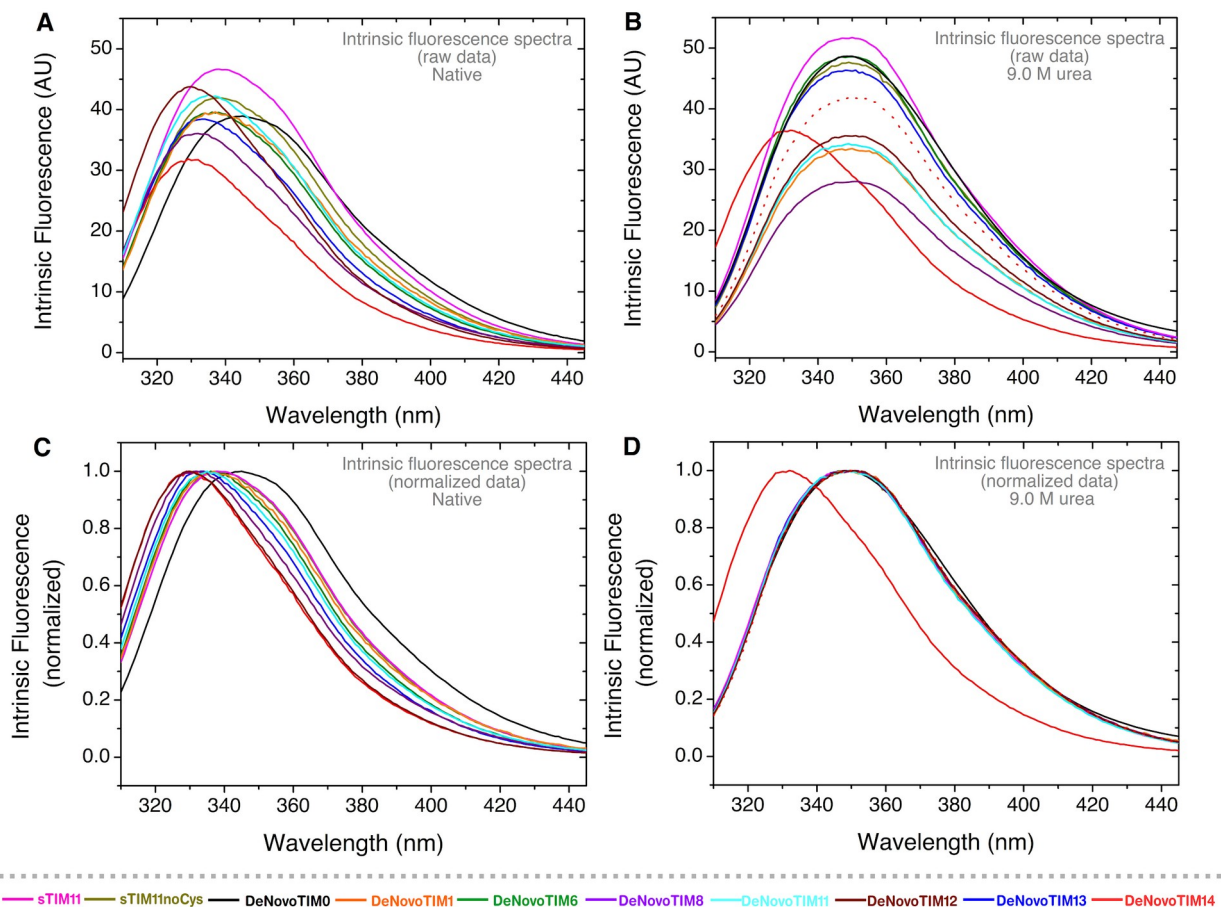

**Fig. S6. Intrinsic fluorescence spectra of DeNovoTIMs.** Native spectra are presented in panel **A** (raw data) and **C** (normalized data). Spectra obtained in 9.0 M urea are presented in panel **B** (raw data) and **D** (normalized data). Note that for DeNovoTIM14 in 9.0 M urea (solid red lines in panels **B** and **D**) the spectra are very similar to the native ones (solid red lines in panels **A** and **C**). In 7.0 M GdnHCl the protein is completely unfolded and its spectrum is identical to all other DeNovoTIMs unfolded in urea (dotted red line in panels **C** and **D**). In all experiments protein concentration was 0.4 mg mL<sup>-1</sup> in 10 mM sodium phosphate pH 8.

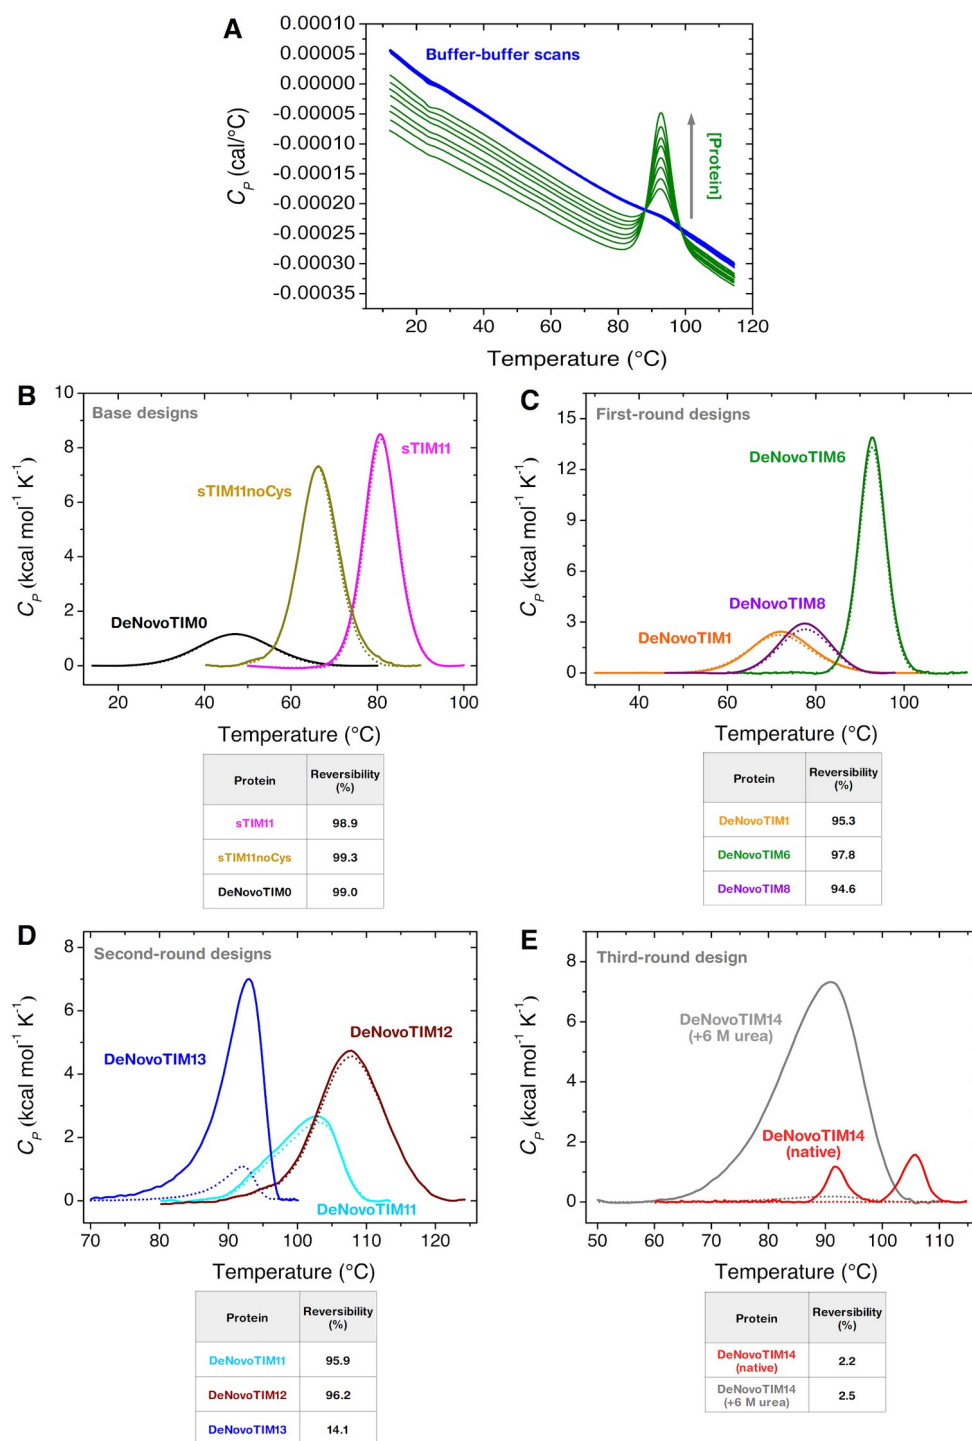

**Fig. S7. DSC instrument equilibration and thermal unfolding reversibility assessment of DeNovoTIMs.** A) Proper instrument equilibration was ascertained by performing two buffer-buffer scans before each protein-buffer scan. One example at different protein concentrations (DeNovoTIM6) is shown in the panel. **B-E)** Thermal unfolding reversibility was assessed with 1.0 mg protein mL<sup>-1</sup> and 1 K min<sup>-1</sup> in 10 mM sodium phosphate pH 8. Continuous lines show the first scan and dotted lines show the second scan collected after cooling down and reheating the sample. Reversibility % was calculated as the ratio of the calorimetric  $\Delta H$  (area under the curve) recovered in the second scan and that obtained in the first scan ( $\Delta H_{\text{secondscan}}/\Delta H_{\text{firstscan}} \times 100$ ).

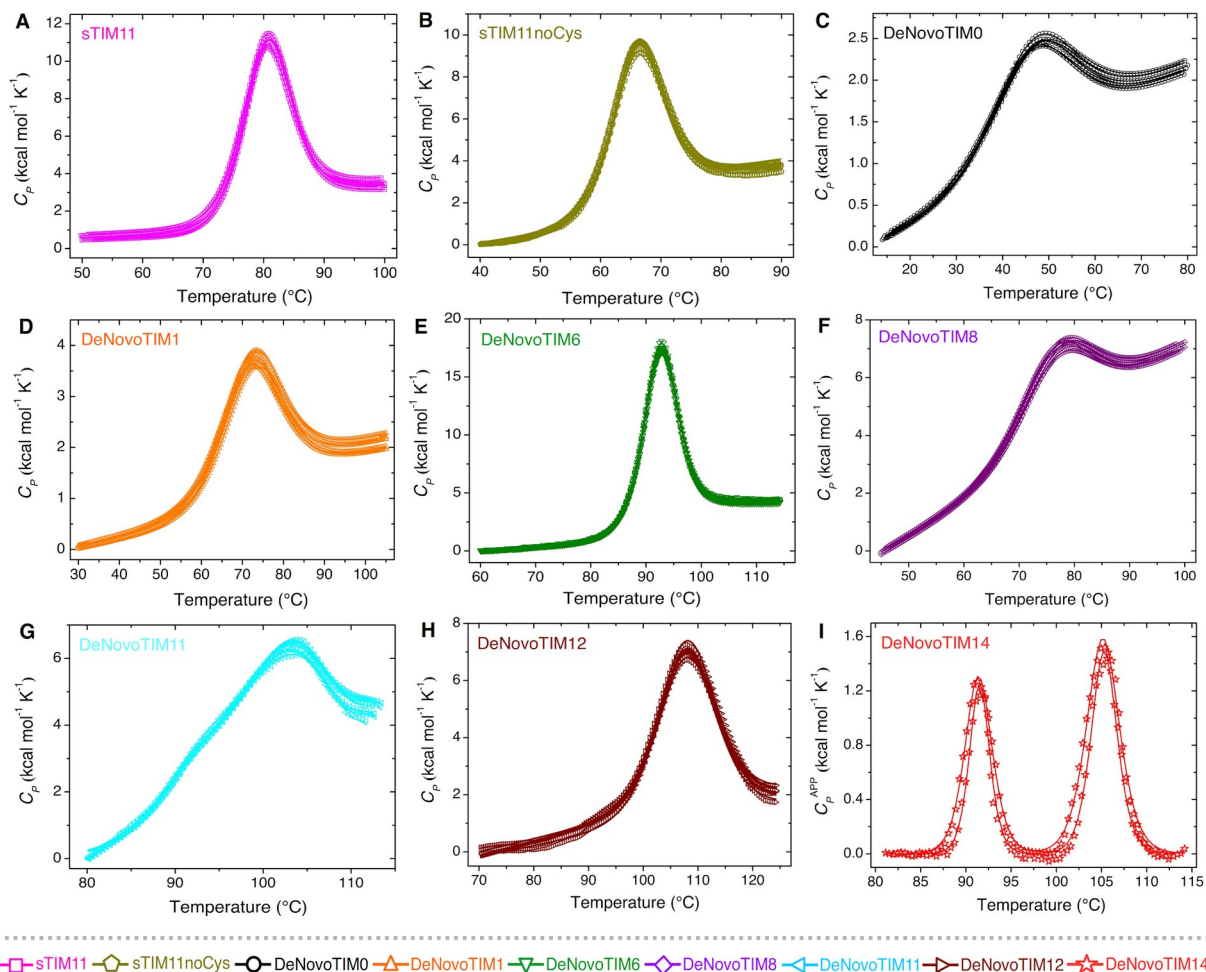

**Fig. S8. DSC endotherms of DeNovoTIMs.** Experiments were carried out at different protein concentrations (panels A-H: 0.25-2.5  $\text{mg mL}^{-1}$ , panel I: 2.5 and 4.5  $\text{mg mL}^{-1}$ ). Open symbols show experimental data and solid lines are the best fits to a two-state model, except for DeNovoTIM14 where a non-two-state model with two transitions was used.

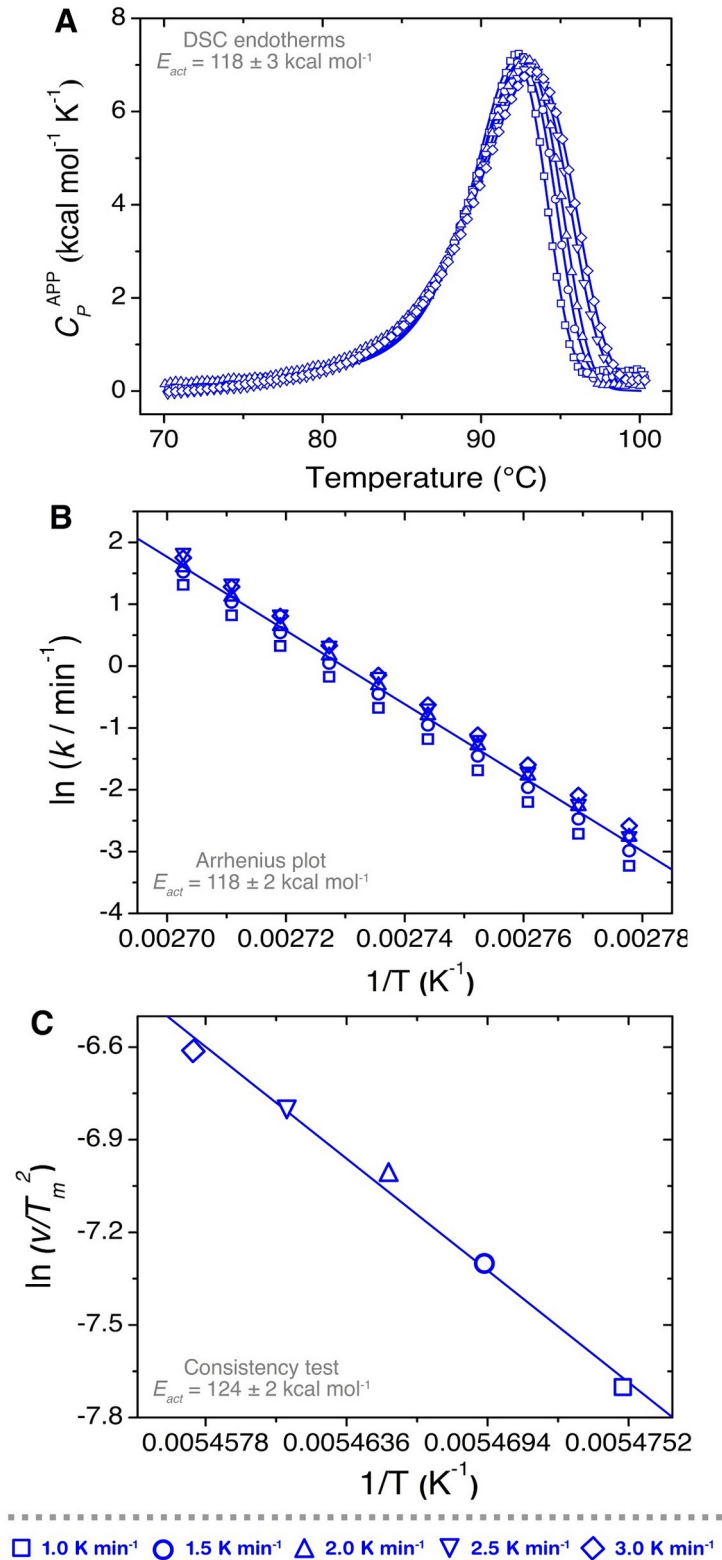

**Fig. S9. Irreversible thermal unfolding of DeNovoTIM13.** **A)** Endotherms at different scan rates (1 to 3 K min $^{-1}$ ). Lines represent the best fit to a two-state irreversible model. **B)** Arrhenius plot. The line shows the best fit to the Arrhenius equation ( $R^2$ : 0.98). **C)** Effect of the scan rate on  $T_m$  ( $R^2$ : 0.99). In all experiments protein concentration was 0.5 mg mL $^{-1}$  in 10 mM sodium phosphate pH 8.

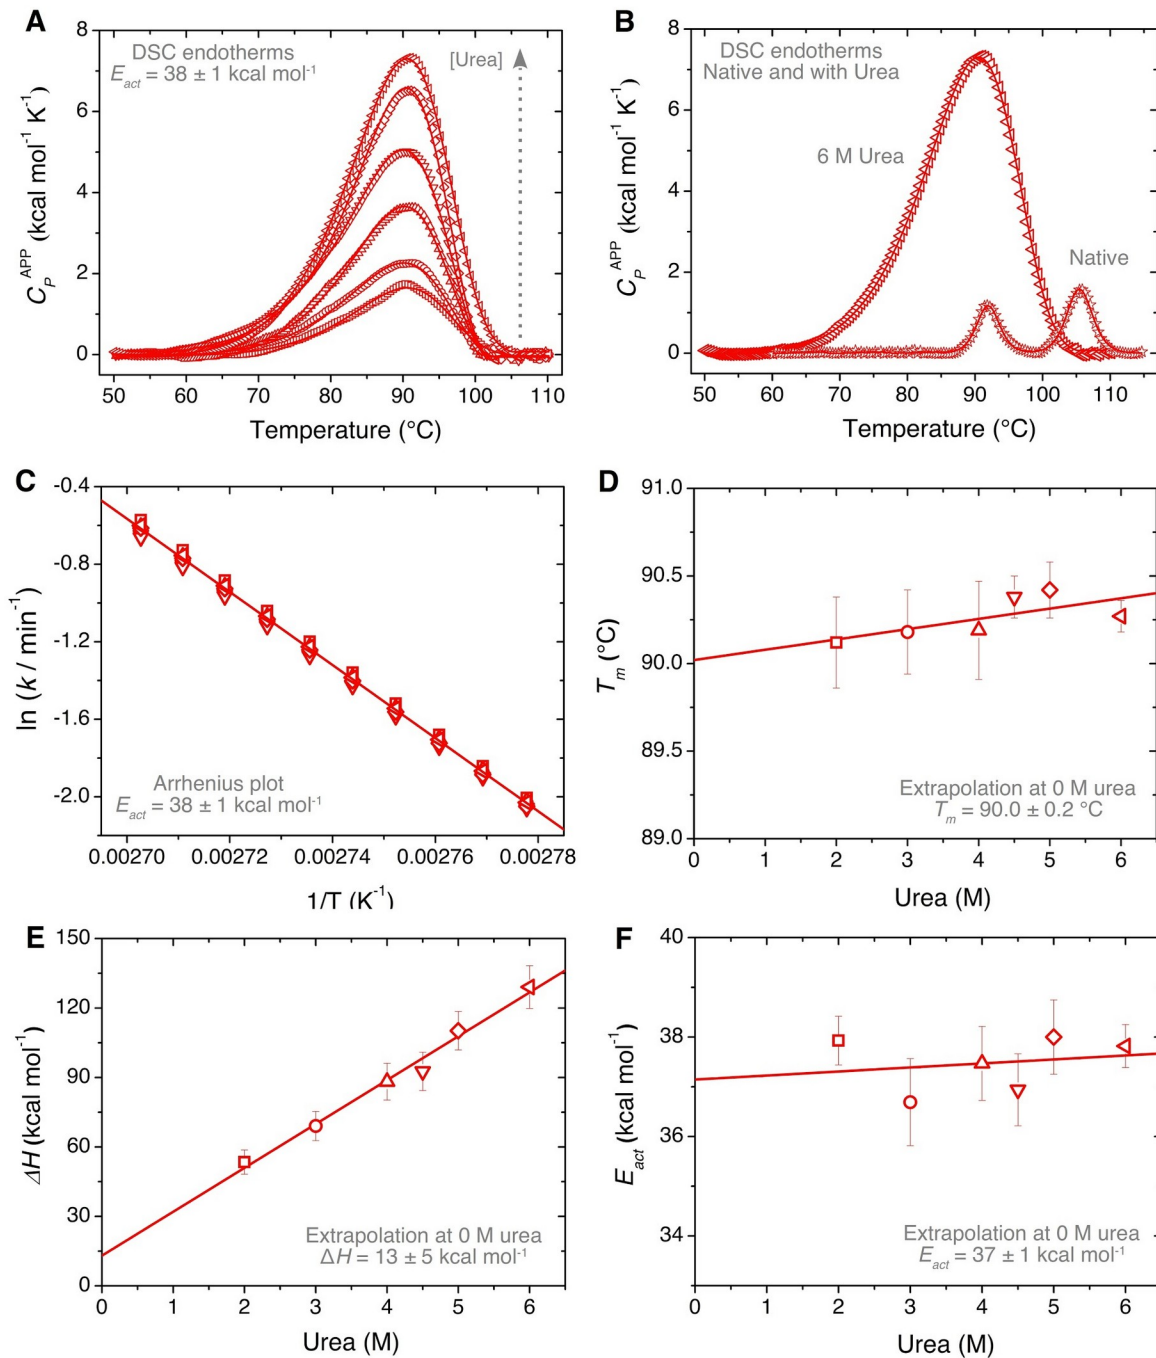

—★— Native —□— 2.0 M urea —○— 3.0 M urea —△— 4.0 M urea —▽— 4.5 M urea —◇— 5.0 M urea —◁— 6.0 M urea

**Fig. S10. Irreversible thermal unfolding of DeNovoTIM14 in the presence of urea.** **A)** DSC endotherms at different urea concentrations (2.0 to 6.0 M). Lines represent the best fit to a two-state irreversible model. **B)** Comparison between DeNovoTIM14 endotherms in native conditions and at 6.0 M urea. **C)** Arrhenius plot. The line shows the best fit to the Arrhenius equation ( $R^2$ : 0.99). **D)**  $T_m$  vs. urea concentration ( $R^2$ : 0.70). **E)**  $\Delta H$  vs. urea concentration ( $R^2$ : 0.99). **F)**  $E_{act}$  vs. urea concentration ( $R^2$ : 0.62). In all experiments protein concentration was 1 mg mL<sup>-1</sup> in 10 mM sodium phosphate pH 8.

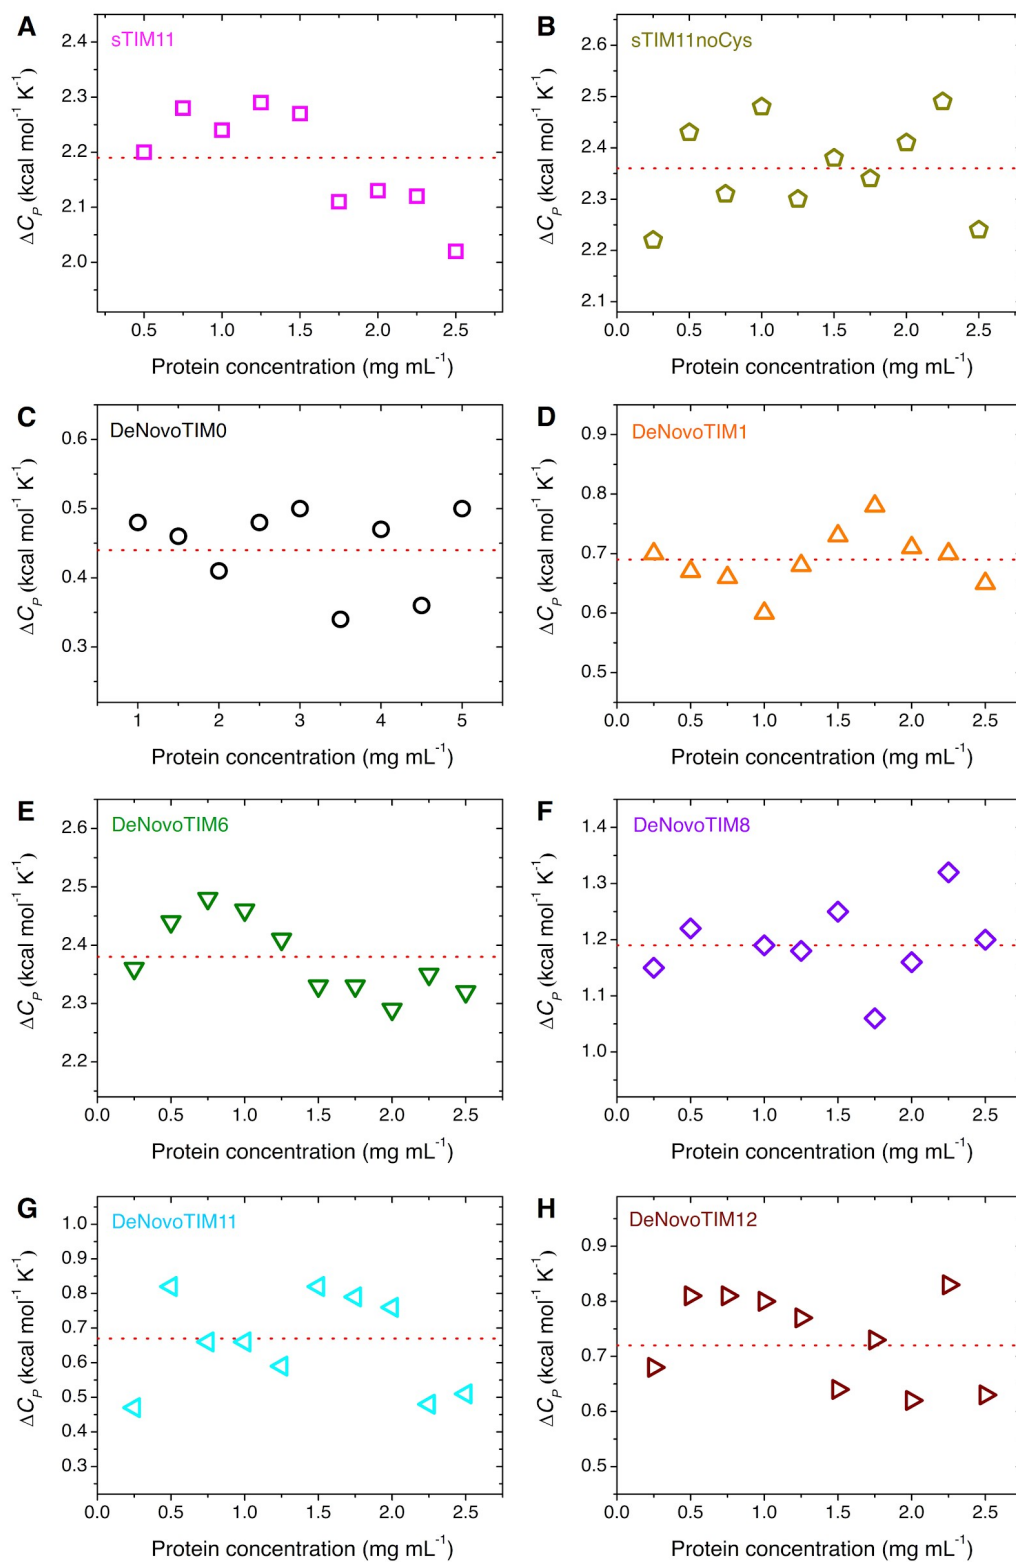

**Fig. S11.  $\Delta C_p$  determination of DeNovoTIMs at different protein concentrations.** DSC experiments (Fig. S8) were carried out in the range of 0.25-2.5 mg mL<sup>-1</sup> (panels A, B, D, E, F, G, H) or 1.0-5.0 mg mL<sup>-1</sup> (panel C). Dotted red lines represent the average value for each protein.

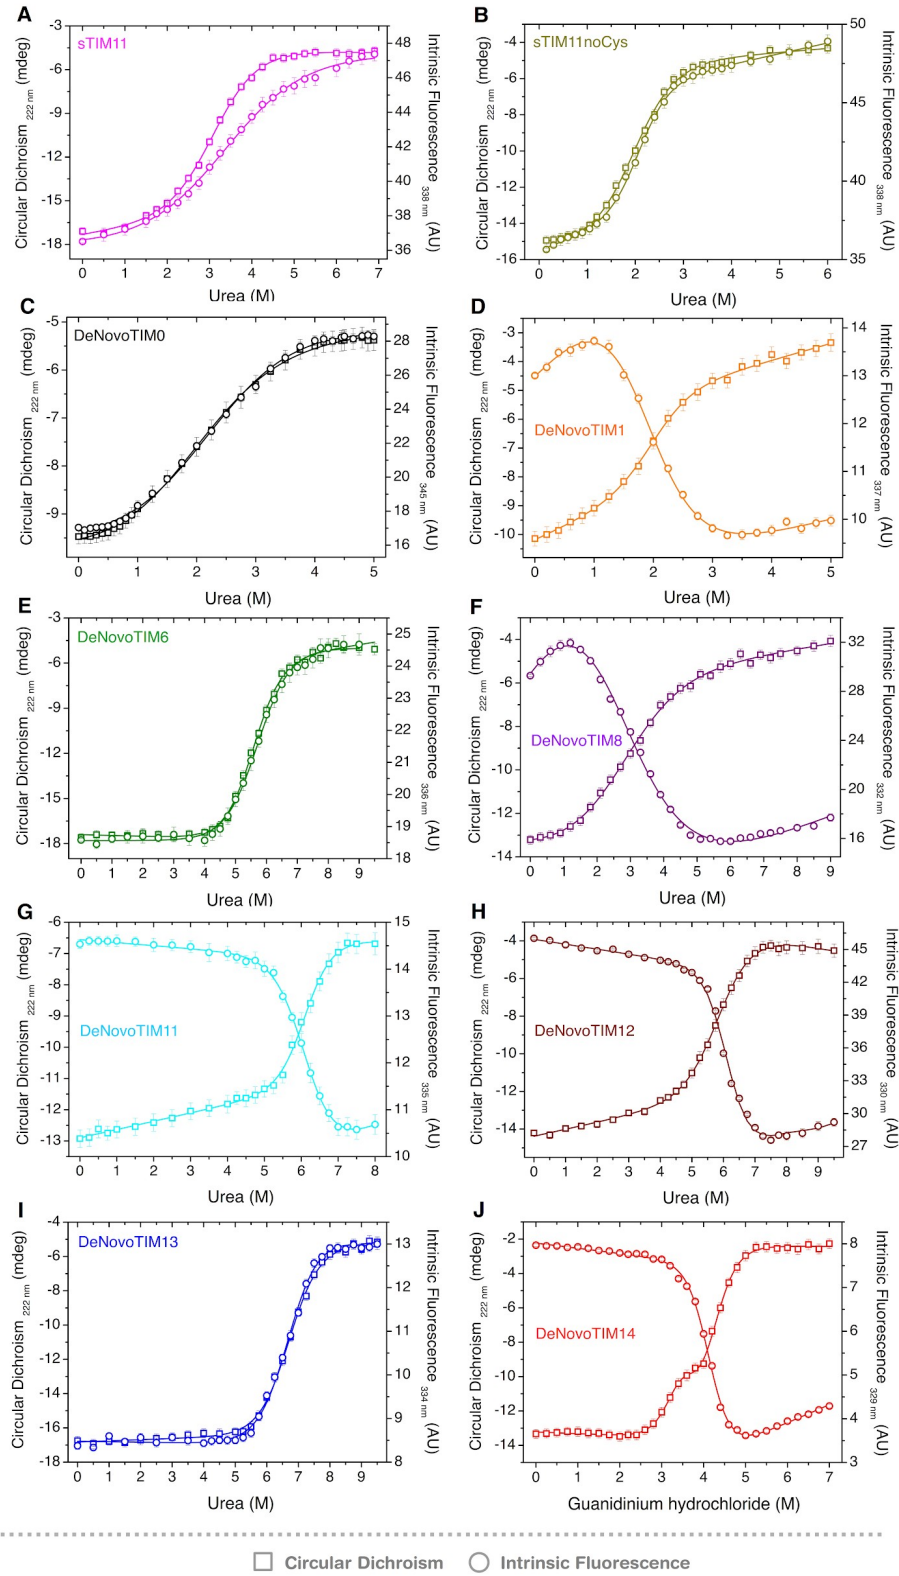

**Fig. S12. Chemical unfolding of DeNovoTIMs followed by CD and IF (raw data).** Lines are the best fits to a two-state model, except for DeNovoTIM14 where a three-state model was used. In all experiments protein concentration was  $0.1 \text{ mg mL}^{-1}$  in 10 mM sodium phosphate pH 8.

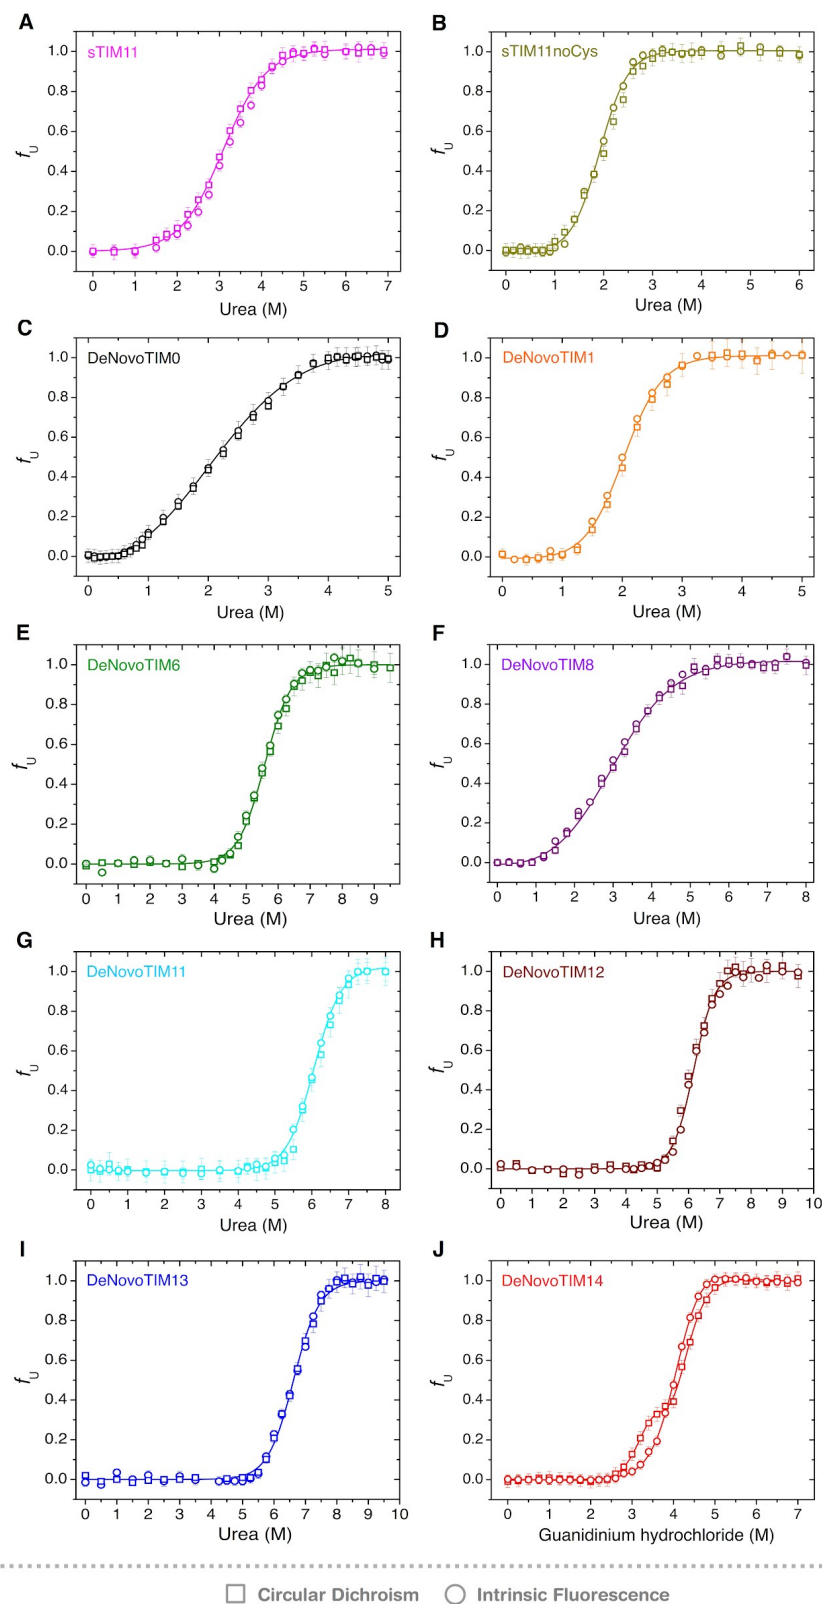

**Fig. S13. Chemical unfolding of DeNovoTIMs followed by CD and IF (normalized data).** Lines are the best fits to a two-state model, except for DeNovoTIM14 where a three-state model was used. In all experiments protein concentration was  $0.1 \text{ mg mL}^{-1}$  in  $10 \text{ mM}$  sodium phosphate pH 8.

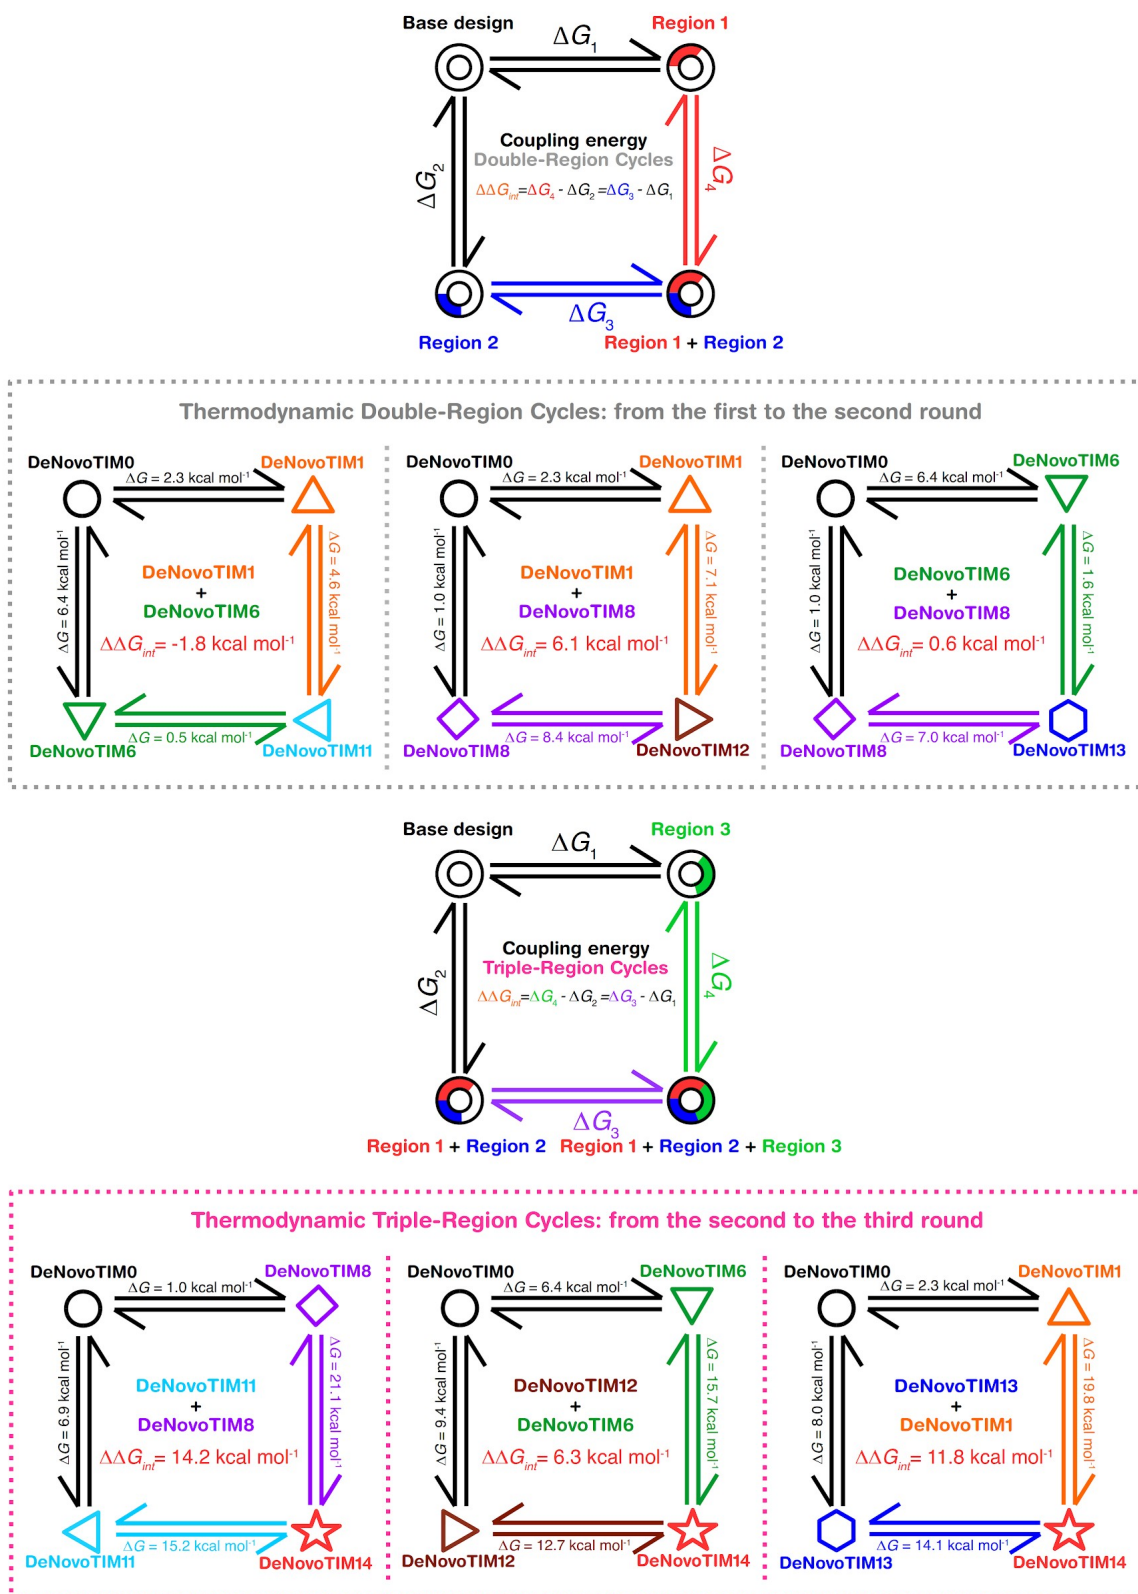

Fig. S14. Thermodynamic cycles for DeNovoTIMs. Thermodynamic cycles for double- and triple-region designs (top and bottom panels, respectively). Coupling energy ( $\Delta\Delta G_{int}$ ) for each case is shown inside each cycle.

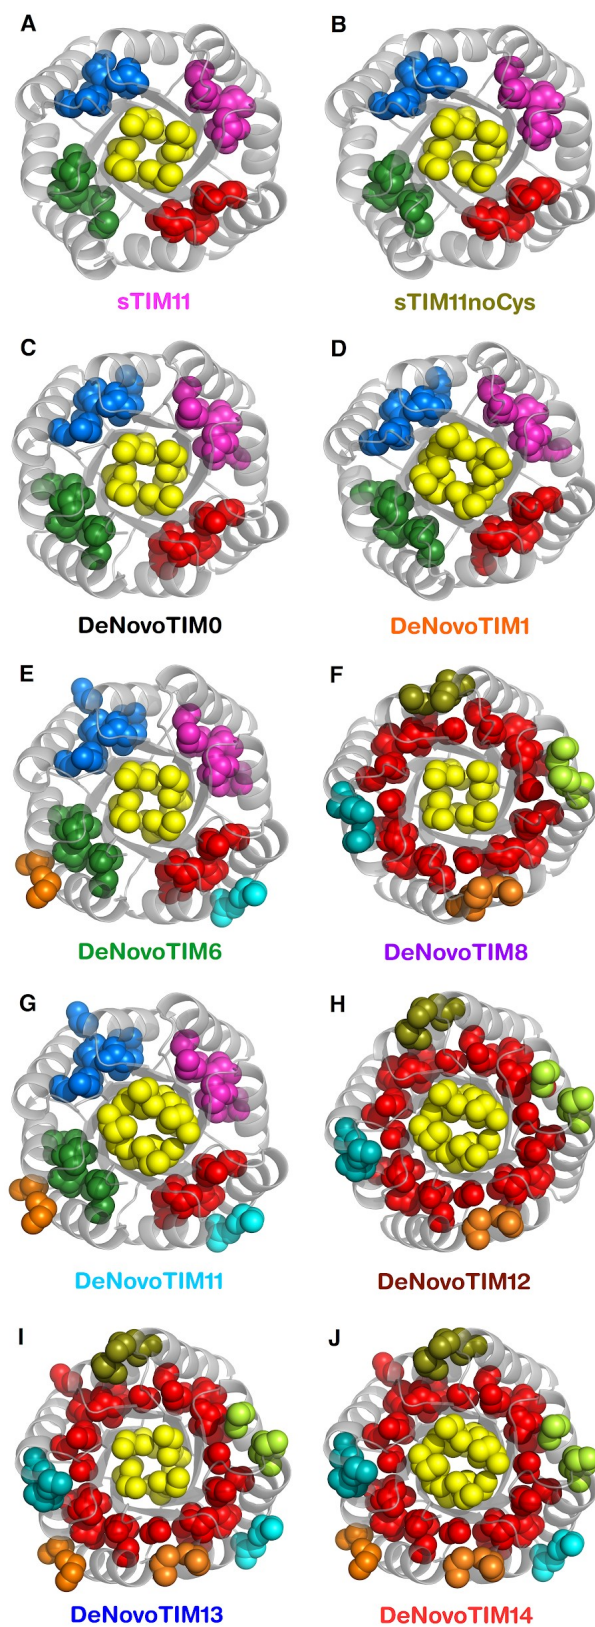

**Fig. S15. Hydrophobic clusters of DeNovoTIMs.** Clusters are shown in different colors. Hydrophobic clusters properties are reported in table S7.

## Supplementary Tables

### List of supplementary tables

- **Table S1:** Amino acid sequences of DeNovoTIM collection.
- **Table S2:** List of mutations in DeNovoTIM collection.
- **Table S3:** Aromatic residues in DeNovoTIM collection.
- **Table S4:** Sequence identity matrix of DeNovoTIM collection.
- **Table S5:** Biochemical and biophysical characterization of the DeNovoTIM collection.
- **Table S6:** Crystallographic data collection and refinement statistics for the three-dimensional structures.
- **Table S7:** Comparison of structural features between Rosetta models and three-dimensional structures.

Table S1. Amino acid sequences of DeNovoTIM collection.

| <i>de novo</i><br>TIM barrel | Sequence                                                                                                                                                                                       |
|------------------------------|------------------------------------------------------------------------------------------------------------------------------------------------------------------------------------------------|
| sTIM11                       | DKDEAWKQVEQLRREGATQIAYRSDDWRDLKEAWKKGADILIVDATDKDEAWKQVEQLRREGATQIAYRSDDWRDLKEAWKKGADILIVDAT<br>DKDEAWKQVEQLRREGATQIAYRSDDWRDLKEAWKKGADILIVDATDKDEAWKQVEQLRREGATQIAYRSDDWRDLKEAWKKGADILICDAT   |
| sTIM11noCys                  | DKDEAWKQVEQLRREGATQIAYRSDDWRDLKEAWKKGADILIVDATDKDEAWKQVEQLRREGATQIAYRSDDWRDLKEAWKKGADILIVDAT<br>DKDEAWKQVEQLRREGATQIAYRSDDWRDLKEAWKKGADILIVDATDKDEAWKQVEQLRREGATQIAYRSDDWRDLKEAWKKGADILIVDAT   |
| DeNovoTIM0                   | DKDEAWKQVEQLRREGATQIAYRSDDWRDLKEAVKKGDDILIVDATDKDEAWKQVEQLRREGATQIAYRSDDWRDLKEAVKKGDDILIVDAT<br>DKDEAWKQVEQLRREGATQIAYRSDDWRDLKEAVKKGDDILIVDATDKDEAWKQVEQLRREGATQIAYRSDDWRDLKEAVKKGDDILIVDAT   |
| DeNovoTIM1                   | DKDEAWKQVEQLRREGATQIVYISDDWRDLKEAVKKGDDILIVDATDKDEAWKQVEQLRREGATQIWIYISDDWRDLKEAVKKGDDILIVDAT<br>DKDEAWKQVEQLRREGATQIVYISDDWRDLKEAVKKGDDILIVDATDKDEAWKQVEQLRREGATQIWIYISDDWRDLKEAVKKGDDILIVDAT |
| DeNovoTIM2                   | DKDEAWKQVEQLRREGATQIVYQSDWRDLKEAVKKGDDILMVDATDKDEAWKQVEQLRREGATQIMYISDDWRDLKEAVKKGDDILVVDAT<br>DKDEAWKQVEQLRREGATQIVYQSDWRDLKEAVKKGDDILMVDATDKDEAWKQVEQLRREGATQIMYISDDWRDLKEAVKKGDDILVVDAT     |
| DeNovoTIM3                   | DKDEAWKQVEQLRREGATQIMYVSDWRDLKEAVKKGDDSLVVDATDKDEAWKQVEQLRREGATQILYKSDWRDLKEAVKKGDDTLVVDAT<br>DKDEAWKQVEQLRREGATQIMYVSDWRDLKEAVKKGDDSLVVDATDKDEAWKQVEQLRREGATQILYKSDWRDLKEAVKKGDDTLVVDAT       |
| DeNovoTIM4                   | DKDEAWKQVEQLRREGATQIMYFSDWRDLKEAVKKGDDLLVVDATDKDEAWKQVEQLRREGATQILYISDDWRDLKEAVKKGDDILLVVDAT<br>DKDEAWKQVEQLRREGATQIMYFSDWRDLKEAVKKGDDLLVVDATDKDEAWKQVEQLRREGATQILYISDDWRDLKEAVKKGDDILLVVDAT   |
| DeNovoTIM5                   | DKDEAWKQVEQLRRLGATQIAYRSDDWRDLREAVKKGDDILIVDATDKDEAWKQVEQLRRLGATQIAYRSDDWRDLREAVKKGDDILIVDAT<br>DKDEAWKQVEQLRRLGATQIAYRSDDWRDLREAVKKGDDILIVDATDKDEAWKQVEQLRRLGATQIAYRSDDWRDLREAVKKGDDILIVDAT   |
| DeNovoTIM6                   | DKDEAWKQVEILRRLGAKQIAYRSDDWRDLQEALKKGGDILIVDATDKDEAWKQVEILRRLGAKQIAYRSDDWRDLQEALKKGGDILIVDAT<br>DKDEAWKQVEILRRLGAKQIAYRSDDWRDLQEALKKGGDILIVDATDKDEAWKQVEILRRLGAKQIAYRSDDWRDLQEALKKGGDILIVDAT   |
| DeNovoTIM7                   | DKDEAWKQVEILRRLGAKQIAYRSDDWRDLDEARKKGGDILIVDATDKDEAWKQVEILRRLGAKQIAYRSDDWRDLDEARKKGGDILIVDAT<br>DKDEAWKQVEILRRLGAKQIAYRSDDWRDLDEARKKGGDILIVDATDKDEAWKQVEILRRLGAKQIAYRSDDWRDLDEARKKGGDILIVDAT   |
| DeNovoTIM8                   | DVDEMLKQVEQLRREGATQIAVRSDDWRLKEAVKKGDDILIVDATDVDEMLKQVEQLRREGATQIAVRSDDWRLKEAVKKGDDILIVDAT<br>DVDEMLKQVEQLRREGATQIAVRSDDWRLKEAVKKGDDILIVDATDVDEMLKQVEQLRREGATQIAVRSDDWRLKEAVKKGDDILIVDAT       |
| DeNovoTIM9                   | DPDEAQKQVEQLRREGATQIAIRSDDWRYLKEAVKKGDDILIVDATDPDEAQKQVEQLRREGATQIAIRSDDWRYLKEAVKKGDDILIVDAT<br>DPDEAQKQVEQLRREGATQIAIRSDDWRYLKEAVKKGDDILIVDATDPDEAQKQVEQLRREGATQIAIRSDDWRYLKEAVKKGDDILIVDAT   |
| DeNovoTIM10                  | DSDEAIKQVEQLRREGATQIAVRMDDWRKLKEAVKKGDDILIVDATDSDEAIKQVEQLRREGATQIAVRMDDWRKLKEAVKKGDDILIVDAT<br>DSDEAIKQVEQLRREGATQIAVRMDDWRKLKEAVKKGDDILIVDATDSDEAIKQVEQLRREGATQIAVRMDDWRKLKEAVKKGDDILIVDAT   |
| DeNovoTIM11                  | DKDEAWKQVEILRRLGAKQIVYISDDWRDLQEALKKGGDILIVDATDKDEAWKQVEILRRLGAKQIWIYISDDWRDLQEALKKGGDILIVDAT<br>DKDEAWKQVEILRRLGAKQIVYISDDWRDLQEALKKGGDILIVDATDKDEAWKQVEILRRLGAKQIWIYISDDWRDLQEALKKGGDILIVDAT |
| DeNovoTIM12                  | DVDEMLKQVEQLRREGATQIVVISDDWRILKEAVKKGDDILIVDATDVDEMLKQVEQLRREGATQIWWISDDWRILKEAVKKGDDILIVDAT<br>DVDEMLKQVEQLRREGATQIVVISDDWRILKEAVKKGDDILIVDATDVDEMLKQVEQLRREGATQIWWISDDWRILKEAVKKGDDILIVDAT   |
| DeNovoTIM13                  | DVDEMLKQVEILRRLGAKQIAVRSDDWRLQEALKKGGDILIVDATDVDEMLKQVEILRRLGAKQIAVRSDDWRLQEALKKGGDILIVDAT<br>DVDEMLKQVEILRRLGAKQIAVRSDDWRLQEALKKGGDILIVDATDVDEMLKQVEILRRLGAKQIAVRSDDWRLQEALKKGGDILIVDAT       |
| DeNovoTIM14                  | DVDEMLKQVEILRRLGAKQIVVISDDWRILQEALKKGGDILIVDATDVDEMLKQVEILRRLGAKQIWWISDDWRILQEALKKGGDILIVDAT<br>DVDEMLKQVEILRRLGAKQIVVISDDWRILQEALKKGGDILIVDATDVDEMLKQVEILRRLGAKQIWWISDDWRILQEALKKGGDILIVDAT   |

Table S2. List of mutations in DeNovoTIM collection.

| <i>de novo</i><br>TIM barrel | Symmetry<br>(fold) | Number of<br>mutations in each<br>modular unit <sup>a</sup> | Total number of<br>mutations in the<br>Sequence | Mutations added in each modular unit <sup>a</sup>                                                                                                 |
|------------------------------|--------------------|-------------------------------------------------------------|-------------------------------------------------|---------------------------------------------------------------------------------------------------------------------------------------------------|
| sTIM11                       | pseudo 4           | ----                                                        | ----                                            | ----                                                                                                                                              |
| sTIM11noCys                  | 4                  | 2<br>(non-symmetric)                                        | 2                                               | C8Q, C181V                                                                                                                                        |
| DeNovoTIM0                   | 4                  | 2                                                           | 8                                               | W34V, A38G                                                                                                                                        |
| DeNovoTIM1                   | 2                  | 5                                                           | 10                                              | A21V, R23I, A67W, R69I, I86V                                                                                                                      |
| DeNovoTIM2                   | 2                  | 7                                                           | 14                                              | A21V, R23Q, I42M, A67M, R69I, I86F, I88V                                                                                                          |
| DeNovoTIM3                   | 2                  | 8                                                           | 16                                              | A21M, R23V, I40S, I42L, A67L, R69K, I86T, I88V                                                                                                    |
| DeNovoTIM4                   | 2                  | 7                                                           | 14                                              | A21M, R23F, I40L, I42V, A67L, R69I, I88L                                                                                                          |
| DeNovoTIM5                   | 4                  | 2                                                           | 8                                               | E15L, K31R                                                                                                                                        |
| DeNovoTIM6                   | 4                  | 5                                                           | 20                                              | Q11I, E15L, T18K, K31Q, V34L                                                                                                                      |
| DeNovoTIM7                   | 4                  | 5                                                           | 20                                              | Q11I, E15L, T18K, K31D, V34R                                                                                                                      |
| DeNovoTIM8                   | 4                  | 5                                                           | 20                                              | K2V, A5M, W6L, Y22V, D29I                                                                                                                         |
| DeNovoTIM9                   | 4                  | 4                                                           | 16                                              | K2P, W6Q, Y22I, D29Y                                                                                                                              |
| DeNovoTIM10                  | 4                  | 5                                                           | 20                                              | K2S, W6I, Y22V, S24M, D29K                                                                                                                        |
| DeNovoTIM11                  | 2                  | 15                                                          | 30                                              | Q11I, E15L, T18K, A21V, R23I, K31Q, V34L, Q57I, E61L, A67W, T64K, R69I, K77Q, V80L, I86V                                                          |
| DeNovoTIM12                  | 2                  | 15                                                          | 30                                              | K2V, A5M, W6L, A21V, Y22V, R23I, D29I, K48V, A51M, W52L, A67W, Y68V, R69I, D75I, I86V                                                             |
| DeNovoTIM13                  | 4                  | 10                                                          | 40                                              | K2V, A5M, W6L, Q11I, E15L, T18K, Y22V, D29I, K31Q, V34L                                                                                           |
| DeNovoTIM14                  | 2                  | 25                                                          | 50                                              | K2V, A5M, W6L, Q11I, E15L, T18K, A21V, Y22V, R23I, D29I, K31Q, V34L, K48V, A51M, W52L, Q57I, E61L, T64K, A67W, Y68V, R69I, D75I, K77Q, V80L, I86V |

<sup>a</sup> Only the mutations incorporated in each design are shown. See Fig. S2 for the complete sequence alignment.

Table S3. Aromatic residues in DeNovoTIM collection.

| <i>de novo</i><br>TIM barrel | Number of Tyr<br>residues in each<br>modular unit | Total number<br>of Trp<br>residues | Position of Trp residues<br>in the modular unit | Number of Tyr<br>residues in each<br>modular unit | Total number<br>of Tyr<br>residues | Position of Tyr residues<br>in the modular unit |
|------------------------------|---------------------------------------------------|------------------------------------|-------------------------------------------------|---------------------------------------------------|------------------------------------|-------------------------------------------------|
| sTIM11                       | 3                                                 | 12                                 | W6, W27, W34                                    | 1                                                 | 4                                  | Y22                                             |
| sTIM11noCys                  | 3                                                 | 12                                 | W6, W27, W34                                    | 1                                                 | 4                                  | Y22                                             |
| DeNovoTIM0                   | 2                                                 | 8                                  | W6, W27                                         | 1                                                 | 4                                  | Y22                                             |
| DeNovoTIM1                   | 5                                                 | 10                                 | W6, W27, W52, W67, W73                          | 2                                                 | 4                                  | Y22, Y68                                        |
| DeNovoTIM2                   | 4                                                 | 8                                  | W6, W27, W52, W73                               | 2                                                 | 4                                  | Y22, Y68                                        |
| DeNovoTIM3                   | 4                                                 | 8                                  | W6, W27, W52, W74                               | 2                                                 | 4                                  | Y22, Y68                                        |
| DeNovoTIM4                   | 4                                                 | 8                                  | W6, W27, W52, W75                               | 2                                                 | 4                                  | Y22, Y68                                        |
| DeNovoTIM5                   | 2                                                 | 8                                  | W6, W27                                         | 1                                                 | 4                                  | Y22                                             |
| DeNovoTIM6                   | 2                                                 | 8                                  | W6, W27                                         | 1                                                 | 4                                  | Y22                                             |
| DeNovoTIM7                   | 2                                                 | 8                                  | W6, W27                                         | 1                                                 | 4                                  | Y22                                             |
| DeNovoTIM8                   | 1                                                 | 4                                  | W27                                             | 0                                                 | 0                                  | -----                                           |
| DeNovoTIM9                   | 1                                                 | 4                                  | W27                                             | 0                                                 | 0                                  | -----                                           |
| DeNovoTIM10                  | 1                                                 | 4                                  | W27                                             | 0                                                 | 0                                  | -----                                           |
| DeNovoTIM11                  | 5                                                 | 10                                 | W6, W27, W52, W67, W73                          | 2                                                 | 4                                  | Y22, Y68                                        |
| DeNovoTIM12                  | 5                                                 | 10                                 | W6, W27, W52, W67, W73                          | 0                                                 | 0                                  | -----                                           |
| DeNovoTIM13                  | 2                                                 | 8                                  | W6, W27                                         | 0                                                 | 0                                  | -----                                           |
| DeNovoTIM14                  | 5                                                 | 10                                 | W6, W27, W52, W67, W73                          | 0                                                 | 0                                  | -----                                           |

Table S4. Sequence identity matrix of DeNovoTIM collection.

| sTIM11      |        |             |            |            |            |            |            |            |            |            |            |            |             |             |             |             |             |  |  |
|-------------|--------|-------------|------------|------------|------------|------------|------------|------------|------------|------------|------------|------------|-------------|-------------|-------------|-------------|-------------|--|--|
| sTIM11noCys | 99     |             |            |            |            |            |            |            |            |            |            |            |             |             |             |             |             |  |  |
| DeNovoTIM0  | 95     | 96          |            |            |            |            |            |            |            |            |            |            |             |             |             |             |             |  |  |
| DeNovoTIM1  | 89     | 90          | 95         |            |            |            |            |            |            |            |            |            |             |             |             |             |             |  |  |
| DeNovoTIM2  | 87     | 88          | 92         | 95         |            |            |            |            |            |            |            |            |             |             |             |             |             |  |  |
| DeNovoTIM3  | 86     | 87          | 91         | 91         | 92         |            |            |            |            |            |            |            |             |             |             |             |             |  |  |
| DeNovoTIM4  | 87     | 88          | 92         | 92         | 92         | 94         |            |            |            |            |            |            |             |             |             |             |             |  |  |
| DeNovoTIM5  | 90     | 91          | 96         | 90         | 88         | 87         | 88         |            |            |            |            |            |             |             |             |             |             |  |  |
| DeNovoTIM6  | 86     | 87          | 89         | 84         | 82         | 80         | 82         | 91         |            |            |            |            |             |             |             |             |             |  |  |
| DeNovoTIM7  | 86     | 87          | 89         | 84         | 82         | 80         | 82         | 91         | 96         |            |            |            |             |             |             |             |             |  |  |
| DeNovoTIM8  | 84     | 85          | 89         | 84         | 82         | 80         | 82         | 85         | 78         | 78         |            |            |             |             |             |             |             |  |  |
| DeNovoTIM9  | 86     | 87          | 91         | 86         | 84         | 83         | 84         | 87         | 80         | 80         | 89         |            |             |             |             |             |             |  |  |
| DeNovoTIM10 | 84     | 85          | 89         | 84         | 82         | 80         | 82         | 85         | 78         | 78         | 89         | 89         |             |             |             |             |             |  |  |
| DeNovoTIM11 | 80     | 82          | 84         | 89         | 84         | 80         | 82         | 86         | 95         | 90         | 73         | 75         | 73          |             |             |             |             |  |  |
| DeNovoTIM12 | 78     | 79          | 84         | 89         | 84         | 80         | 82         | 79         | 73         | 73         | 95         | 84         | 84          | 78          |             |             |             |  |  |
| DeNovoTIM13 | 75     | 76          | 78         | 73         | 71         | 70         | 71         | 80         | 89         | 85         | 89         | 78         | 78          | 84          | 84          |             |             |  |  |
| DeNovoTIM14 | 70     | 71          | 73         | 78         | 73         | 70         | 71         | 75         | 84         | 79         | 84         | 73         | 73          | 89          | 89          | 95          |             |  |  |
|             | sTIM11 | sTIM11noCys | DeNovoTIM0 | DeNovoTIM1 | DeNovoTIM2 | DeNovoTIM3 | DeNovoTIM4 | DeNovoTIM5 | DeNovoTIM6 | DeNovoTIM7 | DeNovoTIM8 | DeNovoTIM9 | DeNovoTIM10 | DeNovoTIM11 | DeNovoTIM12 | DeNovoTIM13 | DeNovoTIM14 |  |  |

Table S5. Biochemical and biophysical characterization of DeNovoTIM collection.

| de novo<br>TIM barrel | Expression/Solubility<br>properties    |                                    | Spectroscopic properties                                  |                |                |                                     |                                      |                               |                       |                         |                             | Hydrodynamic properties <sup>e</sup> |                            |                          |                     |                         |
|-----------------------|----------------------------------------|------------------------------------|-----------------------------------------------------------|----------------|----------------|-------------------------------------|--------------------------------------|-------------------------------|-----------------------|-------------------------|-----------------------------|--------------------------------------|----------------------------|--------------------------|---------------------|-------------------------|
|                       |                                        |                                    | Circular Dichroism                                        |                |                | Intrinsic Fluorescence <sup>d</sup> |                                      |                               |                       |                         |                             |                                      |                            |                          |                     |                         |
|                       |                                        |                                    | Predicted secondary<br>structure content (%) <sup>c</sup> |                |                |                                     |                                      |                               |                       |                         |                             |                                      |                            |                          |                     |                         |
|                       | Soluble<br>overexpression <sup>a</sup> | Aggregation-<br>prone <sup>b</sup> | α-helix                                                   | β-strand       | Random<br>coil | Native<br>λ <sub>max</sub><br>(nm)  | Unfolded<br>λ <sub>max</sub><br>(nm) | Δλ <sub>max</sub> N-U<br>(nm) | Native<br>SCM<br>(nm) | Unfolded<br>SCM<br>(nm) | ΔSCM <sub>N-U</sub><br>(nm) | Theoretical<br>MW<br>(Da)            | Experimental<br>MW<br>(Da) | Exp./<br>Theor.<br>ratio | Oligomeric<br>state | Stokes<br>radius<br>(Å) |
| sTIM11                | +++                                    | +                                  | 46.3<br>(46.0)                                            | 19.8<br>(20.0) | 34.0<br>(34.0) | 338                                 | 350                                  | 12                            | 354                   | 360                     | 7                           | 22854                                | 22017 ± 465                | 1.0                      | Monomer             | 23.2 ± 0.5              |
| sTIM11noCys           | +++                                    | +                                  | 47.6<br>(48.1)                                            | 19.2<br>(22.8) | 33.2<br>(29.1) | 338                                 | 349                                  | 11                            | 353                   | 361                     | 7                           | 22875                                | 20670 ± 146                | 0.9                      | Monomer             | 22.6 ± 0.1              |
| DeNovoTIM0            | ++                                     | +                                  | 41.4                                                      | 30.7           | 27.9           | 345                                 | 352                                  | 7                             | 357                   | 362                     | 5                           | 22471                                | 29827 ± 309                | 1.3                      | Monomer             | 26.1 ± 0.3              |
| DeNovoTIM1            | ++                                     | ++                                 | 42.7                                                      | 29.3           | 27.9           | 337                                 | 350                                  | 13                            | 354                   | 360                     | 6                           | 22557                                | 21017 ± 637                | 0.9                      | Monomer             | 22.8 ± 0.8              |
| DeNovoTIM6            | +++                                    | +                                  | 46.5<br>(43.4)                                            | 18.8<br>(20.7) | 34.8<br>(35.9) | 336                                 | 350                                  | 14                            | 352                   | 361                     | 9                           | 22568                                | 22000 ± 440                | 1.0                      | Monomer             | 23.2 ± 0.5              |
| DeNovoTIM8            | ++                                     | ++                                 | 47.1                                                      | 22.3           | 30.6           | 332                                 | 351                                  | 19                            | 348                   | 361                     | 13                          | 22039                                | 20518 ± 360                | 0.9                      | Monomer             | 22.6 ± 0.3              |
| DeNovoTIM11           | +                                      | +++                                | 46.9                                                      | 22.9           | 30.0           | 335                                 | 349                                  | 14                            | 353                   | 362                     | 9                           | 22598                                | 20920 ± 572                | 0.9                      | Monomer             | 22.3 ± 0.6              |
| DeNovoTIM12           | +++                                    | +                                  | 45.5                                                      | 24.7           | 29.7           | 330                                 | 351                                  | 21                            | 347                   | 360                     | 13                          | 22125                                | 20029 ± 760                | 0.9                      | Monomer             | 23.1 ± 0.9              |
| DeNovoTIM13           | +++                                    | +++                                | 48.3<br>(48.8)                                            | 18.1<br>(21.8) | 33.5<br>(29.4) | 334                                 | 351                                  | 17                            | 351                   | 360                     | 8                           | 22080                                | 21601 ± 725                | 1.0                      | Monomer             | 22.7 ± 0.7              |
| DeNovoTIM14           | +                                      | +++                                | 50.3                                                      | 18.7           | 31.1           | 329                                 | 350<br>(331)                         | 21                            | 346                   | 362<br>(349)            | 15                          | 22166                                | 25357 ± 1833               | 1.2                      | Monomer             | 24.7 ± 1.8              |

<sup>a</sup> Symbols represent the amount of protein purified from the soluble fraction: +++ >10 mg L<sup>-1</sup> culture, ++ 5-10 mg L<sup>-1</sup> culture, + 2-5 mg L<sup>-1</sup> culture.

<sup>b</sup> Symbols represent the protein propensity to aggregate: +++ aggregation visible within the first week after purification, ++ aggregation visible between 1-2 weeks after purification, + not visible aggregation after at least 1 month after purification.

<sup>c</sup> numbers within brackets are the calculated value from the three-dimensional structure.

<sup>d</sup> unfolded state represents the spectra at 9.0 M urea.

<sup>e</sup> ± indicates the standard deviation calculated from 4 different experiments at protein concentrations of 0.01, 0.5, 1.0, and 2.0 mg mL<sup>-1</sup>.

Table S6. Crystallographic data collection and refinement statistics for the three-dimensional structures.

| <i>de novo</i> TIM barrel                           | sTIM11noCys                                                                   | DeNovoTIM6                                                                                   | DeNovoTIM13                                                                             |
|-----------------------------------------------------|-------------------------------------------------------------------------------|----------------------------------------------------------------------------------------------|-----------------------------------------------------------------------------------------|
| Data collection <sup>a</sup>                        |                                                                               |                                                                                              |                                                                                         |
| PDB ID                                              | 6YQY                                                                          | 6Z2I                                                                                         | 6YQX                                                                                    |
| Crystallization condition                           | 0.2 M Ammonium sulfate<br>0.1 M Trisodium citrate pH: 5.6<br>25% w/v PEG 4000 | 0.095 M Sodium citrate pH: 5.0<br>19% v/v Isopropanol<br>25% w/v PEG 4000<br>5% v/v Glycerol | 0.17 M Sodium acetate<br>0.085 M TRIS pH: 8.5<br>25.5% w/v PEG 4000<br>15% v/v Glycerol |
| Resolution range (Å)                                | 47.15 – 1.88 (1.94 – 1.88)                                                    | 30.93 – 2.90 (3.01 – 2.90)                                                                   | 44.79 – 1.64 (1.70 – 1.64)                                                              |
| Space group                                         | P 4 <sub>1</sub> 2 <sub>1</sub> 2 (92)                                        | P 4 (75)                                                                                     | P 3 <sub>2</sub> (145)                                                                  |
| Unit cell dimensions                                |                                                                               |                                                                                              |                                                                                         |
| a, b, c, (Å)                                        | 50.45, 50.45, 132.41                                                          | 87.48, 87.48, 44.26                                                                          | 51.72, 51.72, 63.97                                                                     |
| α, β, γ (°)                                         | 90, 90, 90                                                                    | 90, 90, 90                                                                                   | 90, 90, 120                                                                             |
| Total reflections                                   | 342791 (32681)                                                                | 56016 (3033)                                                                                 | 79664 (7327)                                                                            |
| Unique reflections                                  | 14703 (1410)                                                                  | 7620 (389)                                                                                   | 23407 (2280)                                                                            |
| Multiplicity                                        | 23.3 (23.2)                                                                   | 7.4 (7.8)                                                                                    | 3.4 (3.2)                                                                               |
| Completeness (%)                                    | 99.9 (99.0)                                                                   | 99.8 (100.0)                                                                                 | 99.5 (97.6)                                                                             |
| Mean I / sigma (I)                                  | 27.0 (1.9)                                                                    | 4.3 (1.0)                                                                                    | 14.3 (1.5)                                                                              |
| R-merge                                             | 0.061 (1.281)                                                                 | 0.180 (1.195)                                                                                | 0.042 (0.552)                                                                           |
| CC1/2                                               | 1.000 (0.810)                                                                 | 0.940 (0.773)                                                                                | 0.998 (0.659)                                                                           |
| Average mosaicity (deg)                             | 0.109                                                                         | 0.179                                                                                        | 0.116                                                                                   |
| Refinement statistics <sup>a</sup>                  |                                                                               |                                                                                              |                                                                                         |
| R <sub>work</sub> , R <sub>free</sub>               | 0.220 (0.287), 0.271 (0.371)                                                  | 0.316 (0.368), 0.372 (0.431)                                                                 | 0.171 (0.274), 0.201 (0.329)                                                            |
| Average B-value (Å <sup>2</sup> )                   | 54.2                                                                          | 89.3                                                                                         | 39.1                                                                                    |
| Protein                                             | 53.9                                                                          | 89.4                                                                                         | 37.7                                                                                    |
| Ligand                                              | -----                                                                         | -----                                                                                        | 61.3                                                                                    |
| Solvent                                             | 62.2                                                                          | 77.1                                                                                         | 53.5                                                                                    |
| Overall B factor from Wilson Plot (Å <sup>2</sup> ) | 41.0                                                                          | 73.8                                                                                         | 28.4                                                                                    |
| Number of atoms                                     | 1489                                                                          | 1185                                                                                         | 1603                                                                                    |
| Protein                                             | 1440                                                                          | 1175                                                                                         | 1464                                                                                    |
| Ligand                                              | 0                                                                             | 0                                                                                            | 7                                                                                       |
| Water                                               | 49                                                                            | 10                                                                                           | 132                                                                                     |
| Protein residues                                    | 178                                                                           | 168                                                                                          | 181                                                                                     |
| RMS (bonds) (Å)                                     | 0.008                                                                         | 0.003                                                                                        | 0.006                                                                                   |
| RMS (angles) (°)                                    | 0.900                                                                         | 0.560                                                                                        | 0.770                                                                                   |
| Ramachandran favored (%)                            | 97.1                                                                          | 93.6                                                                                         | 100.0                                                                                   |
| Ramachandran allowed (%)                            | 2.9                                                                           | 6.4                                                                                          | 0.0                                                                                     |
| Ramachandran outliers (%)                           | 0.0                                                                           | 0.0                                                                                          | 0.0                                                                                     |
| Rotamer outliers (%)                                | 0.0                                                                           | 0.0                                                                                          | 0.0                                                                                     |
| Clashscore                                          | 8.2                                                                           | 5.3                                                                                          | 3.9                                                                                     |

<sup>a</sup> Statistics for the highest resolution shell are shown in parentheses.

Table S7. Comparison of structural features between Rosetta models and three-dimensional structures.

| Design round                                                 | Base designs |           |             |           |            | First-round designs: Internal Core |            |            |            | First-round designs: Bottom Core |            |           | First-round designs: Top Core |            |            | Second-round designs |             |             |             | Third-round design |             |
|--------------------------------------------------------------|--------------|-----------|-------------|-----------|------------|------------------------------------|------------|------------|------------|----------------------------------|------------|-----------|-------------------------------|------------|------------|----------------------|-------------|-------------|-------------|--------------------|-------------|
| Property / <i>de novo</i> TIM barrel                         | sTIM11       |           | sTIM11noCys |           | DeNovoTIM0 | DeNovoTIM1                         | DeNovoTIM2 | DeNovoTIM3 | DeNovoTIM4 | DeNovoTIM5                       | DeNovoTIM6 |           | DeNovoTIM7                    | DeNovoTIM8 | DeNovoTIM9 | DeNovoTIM10          | DeNovoTIM11 | DeNovoTIM12 | DeNovoTIM13 |                    | DeNovoTIM14 |
|                                                              | model        | structure | model       | structure | model      | model                              | model      | model      | model      | model                            | model      | structure | model                         | model      | model      | model                | model       | model       | model       | structure          | model       |
| Structural properties                                        |              |           |             |           |            |                                    |            |            |            |                                  |            |           |                               |            |            |                      |             |             |             |                    |             |
| H-bonds                                                      | 236          | 204       | 194         | 171       | 198        | 201                                | 197        | 201        | 201        | 209                              | 176        | 138       | 189                           | 201        | 184        | 177                  | 169         | 174         | 167         | 195                | 163         |
| Salt bridges                                                 | 47           | 22        | 37          | 16        | 27         | 39                                 | 39         | 41         | 39         | 47                               | 27         | 4         | 37                            | 35         | 25         | 27                   | 34          | 14          | 22          | 18                 | 28          |
| Total area in hydrophobic clusters (Å²)                      | 4088         | 3765      | 4260        | 4215      | 4793       | 6530                               | 4800       | 4774       | 6042       | 5221                             | 5195       | 5097      | 4533                          | 6849       | 5812       | 5507                 | 4485        | 7471        | 6381        | 6148               | 7730        |
| Area of the major hydrophobic cluster (Å²)                   | 1171         | 1116      | 1035        | 1111      | 1066       | 2605                               | 983        | 984        | 2114       | 1169                             | 1180       | 1111      | 1162                          | 4610       | 4611       | 4329                 | 2524        | 4265        | 4416        | 4351               | 4519        |
| % of total area present in the major hydrophobic cluster     | 29           | 30        | 24          | 26        | 22         | 40                                 | 20         | 21         | 35         | 22                               | 23         | 22        | 26                            | 67         | 79         | 79                   | 56          | 57          | 69          | 71                 | 58          |
| Total residues in hydrophobic clusters                       | 31           | 31        | 32          | 32        | 36         | 42                                 | 36         | 36         | 40         | 40                               | 41         | 43        | 36                            | 52         | 40         | 40                   | 50          | 57          | 56          | 60                 | 64          |
| Residues in the major hydrophobic cluster                    | 8            | 8         | 8           | 8         | 8          | 14                                 | 7          | 7          | 12         | 8                                | 8          | 9         | 8                             | 32         | 32         | 32                   | 14          | 32          | 33          | 38                 | 34          |
| % of total residues present in the major hydrophobic cluster | 26           | 26        | 25          | 25        | 22         | 33                                 | 19         | 19         | 30         | 20                               | 20         | 21        | 22                            | 62         | 80         | 80                   | 28          | 56          | 59          | 63                 | 53          |
| Total contacts in hydrophobic clusters                       | 82           | 81        | 89          | 91        | 98         | 120                                | 84         | 88         | 112        | 104                              | 103        | 113       | 94                            | 143        | 122        | 114                  | 129         | 152         | 133         | 150                | 166         |
| Contacts in the major hydrophobic cluster                    | 24           | 23        | 24          | 23        | 23         | 48                                 | 18         | 18         | 40         | 24                               | 23         | 24        | 23                            | 96         | 99         | 92                   | 48          | 91          | 94          | 111                | 104         |
| % of total contacts present in the major hydrophobic cluster | 29           | 28        | 27          | 25        | 23         | 40                                 | 21         | 20         | 36         | 23                               | 22         | 21        | 24                            | 67         | 81         | 81                   | 37          | 60          | 71          | 74                 | 63          |
| Total ASA of the folded protein (Å²)                         | 8661         | 8669      | 8784        | 8761      | 8920       | 8336                               | 8366       | 8362       | 8360       | 8323                             | 9126       | 9052      | 9149                          | 8472       | 9187       | 9140                 | 9002        | 9016        | 9070        | 8867               | 8730        |
| Hydrophobic ASA of the folded protein (%)                    | 48           | 51        | 46          | 51        | 47         | 46                                 | 45         | 46         | 46         | 47                               | 52         | 58        | 50                            | 46         | 48         | 48                   | 50          | 50          | 53          | 53                 | 51          |
| Total ΔASA buried on protein folding (Å²)                    | 18893        | 17815     | 18844       | 17331     | 18199      | 19380                              | 19335      | 19017      | 19429      | 19060                            | 18878      | 17251     | 18141                         | 18955      | 18000      | 17947                | 19469       | 19008       | 19111       | 18928              | 20048       |
| Hydrophobic ΔASA buried on protein folding (%)               | 79           | 77        | 79          | 74        | 77         | 79                                 | 78         | 78         | 79         | 79                               | 79         | 70        | 81                            | 80         | 78         | 80                   | 77          | 80          | 79          | 75                 | 78          |
| Physicochemical amino acid properties (%)                    |              |           |             |           |            |                                    |            |            |            |                                  |            |           |                               |            |            |                      |             |             |             |                    |             |
| Aliphatic (AGILPV)                                           | 34           |           | 35          |           | 37         | 38                                 | 35         | 35         | 37         | 39                               | 41         | 39        | 43                            | 41         | 41         | 42                   | 45          | 48          |             | 49                 |             |
| Aromatic (FHWY)                                              | 9            |           | 9           |           | 7          | 8                                  | 8          | 7          | 8          | 7                                | 7          | 7         | 2                             | 4          | 2          | 8                    | 3           | 2           |             | 3                  |             |
| Charged (DEHKR)                                              | 43           |           | 43          |           | 43         | 41                                 | 41         | 42         | 41         | 41                               | 41         | 46        | 39                            | 39         | 41         | 39                   | 37          | 37          |             | 35                 |             |
| Hydrophobic (CFILMVW)                                        | 24           |           | 24          |           | 24         | 28                                 | 27         | 25         | 28         | 26                               | 28         | 26        | 33                            | 24         | 28         | 33                   | 37          | 37          |             | 41                 |             |
| Polar (DEKNQR)                                               | 49           |           | 50          |           | 50         | 48                                 | 49         | 49         | 48         | 48                               | 48         | 50        | 46                            | 48         | 48         | 46                   | 43          | 43          |             | 41                 |             |
